# Supplementary material
Source: publisher site journal article supplement (https://www.dovepress.com/get_supplementary_file.php?f=379428.docx)
Supplement: Supplementary file 1 [file get_supplementary_file.php]

**Supplementary materials**

**Table S1:** Baseline descriptive clinical, biochemical and radiologic statistics. ALBI score: Albumin-Bilirubin score; AFP: alpha-fetoprotein; INR: international normalized ratio; IQR: interquartile range; MELD: model for end-stage liver disease; THID: transient hepatic intensity differences; THAD: transient hepatic attenuation differences; TIPS: transjugular intrahepatic portosystemic shunt.

| **Characteristics** | **Entire Cohort (n=55)** | **Treatment Naïve patients (n=23)** | **Patients who received prior treatment (n=32)** |
| --- | --- | --- | --- |
| **Age - median year - median (min-max; IQR)** | 66.0 (36-80; 12) | 65 (36-80; 10) | 68.0 (52-80; 14) |
| ≤65 | 24 (43.6) | 12 (52.2) | 12 (37.5) |
| >65 | 31 (56.4) | 11 (47.8) | 20 (62.5) |
| **Gender - n (%)** |  |  |  |
| Female | 10 (18.2) | 7 (30.4) | 3 (87.5) |
| Male | 45 (81.8) | 16 (69.6) | 4 (12.5) |
| **Prior treatment - n (%)** |  |  |  |
| No | 23 (41.8) | 23 (100.0) | 0 (0.0) |
| Yes | 32 (58.2) | 0 (0.0) | 32 (100.0) |
| **Locoregional therapy to extra-hepatic metastases while on atezolizumab-bevacizumab - n (%)** |  |  |  |
| No | 48 (87.3) | 20 (87.0) | 28 (87.5) |
| Yes | 7 (12.7) | 3 (13.0) | 4 (12.5) |
| **Duration between diagnosis to atezolizumab-bevacizumab, median months (min-max; IQR)** | 11.7 (0.3-132.8; 23.8) | 1.3 (0.3-4.1; 1.4) | 23.0 (4.8-132.1; 30.1) |
| **Ascites - n (%)** |  |  |  |
| None | 37 (67.3) | 14 (69.6) | 23 (71.9) |
| Mild | 18 (32.7) | 7 (30.4) | 9 (28.1) |
| **Pleural effusion - n (%)** |  |  |  |
| None | 50 (90.9) | 21 (91.3) | 29 (90.6) |
| Mild | 5 (9.1) | 2 (8.7) | 3 (9.4) |
| **Largest intrahepatic tumor diameter, median cm (min-max; IQR)** | 6.9 (1.4-17.5; 7.5) | 9.2 (2.8-17.5; 7.2) | 4.3 (1.4-16.1; 7.5) |
| ≤7 cm | 28 (52.8) | 8 (34.8) | 20 (66.7) |
| >7 cm | 25 (47.2) | 15 (65.2) | 10 (33.3) |
| **Number of intra-hepatic disease foci grouped - n (%)** |  |  |  |
| 0-3 | 9 (16.4) | 1 (34.8) | 8 (25.0) |
| ≥4 | 46 (83.6) | 22 (95.7) | 24 (75.0) |
| **Tumor margin - n (%)** |  |  |  |
| Well-demarcated | 22 (41.5) | 9 (39.1) | 13 (43.3) |
| Irregular | 31 (58.5) | 14 (60.9) | 17 (56.7) |
| **Enhancing capsule - n (%)** |  |  |  |
| Absent | 38 (71.7) | 17 (73.9) | 21 (70.0) |
| Present | 15 (28.3) | 6 (26.1) | 9 (30.0) |
| **THID/THAD - n (%)** |  |  |  |
| Absent | 46 (86.8) | 20 (87.0) | 26 (86.7) |
| Present | 7 (13.2) | 3 (13.0) | 4 (13.3) |
| **Necrosis - n (%)** |  |  |  |
| Absent | 15 (28.3 | 6 (26.1) | 9 (30.0) |
| Present | 38 (71.7) | 17 (73.9) | 21 (70.0) |
| **Extracapsular extension - n (%)** |  |  |  |
| Absent | 39 (73.6) | 18 (78.3) | 21 (70.0) |
| Present | 14 (26.4) | 5 (21.7) | 9 (30.0) |
| **Liver parenchyma pre-contrast density, median HU (min-max; IQR)** | 53 (25-63; 15) | 51 (29-61; 15) | 54 (25-63; 15) |
| ≤45 | 10 (28.6) | 5 (38.5) | 5 (22.7) |
| >45 | 25 (71.4) | 8 (61.5) | 17 (77.3) |
| **Tumor pre-contrast density, median HU (min-max; IQR)** | 39 (21-54; 14) | 41 (26-46; 13) | 38 (21-54; 13) |
| <40 | 17 (50.0) | 5 (38.5) | 12 (57.1) |
| ≥40 | 17 (50.0) | 8 (61.5) | 9 (42.9) |
| **Tumor arterial phase density, median HU (min-max; IQR)** | 99 (52-222; 41) | 120 (61-222, 49) | 94 (52-188; 27) |
| ≤100 | 19 (55.9) | 5 (38.5) | 14 (66.7) |
| >100 | 15 (44.1) | 8 (61.5) | 7 (33.3) |
| **Tumor portal phase, median HU (min-max; IQR)** | 101 (44-209; 34) | 100 (61-209; 42) | 101 (44-136; 26) |
| ≤100 | 17 (50.0) | 7 (53.8) | 10 (47.6) |
| >100 | 17 (50.0) | 6 (46.2) | 11 (52.4) |
| **Tumor delayed phase, median HU (min-max; IQR)** | 79 (44-121; 22) | 75 (62-103; 15) | 81 (44-121; 24) |
| ≤100 | 30 (88.2) | 12 (92.3) | 18 (85.7) |
| >100 | 4 (11.8) | 1 (7.7) | 3 (14.3) |
| **Portal vein tumor thrombus - n (%)** |  |  |  |
| None | 34 (61.8) | 12 (52.2) | 22 (68.8) |
| Small (<2cm) | 6 (10.9) | 3 (13.0) | 3 (9.4) |
| >2cm without main portal vein involvement | 10 (18.2) | 4 (17.4) | 6 (18.8) |
| >2cm with main portal vein involvement | 5 (9.1) | 4 (17.4) | 1 (3.1) |
| **Portal vein tumor thrombus, dichotomized** |  |  |  |
| None or <2cm | 40 (72.7) | 15 (65.2) | 25 (78.1) |
| > 2cm with or without main portal vein involvement | 15 (27.3) | 8 (34.8) | 7 (21.9) |
| **Portal vein bland thrombus - n (%)** |  |  |  |
| None | 51 (92.7) | 21 (91.3) | 30 (93.8) |
| Small (<2cm) | 3 (5.5) | 1 (4.3) | 2 (6.3) |
| >2cm without main portal vein involvement | 1 (1.8) | 1 (4.3) | 0 (0.0) |
| >2cm with main portal vein involvement | 0 (0.0) | 0 (0.0) | 0 (0.0) |
| **Hepatic vein tumor thrombus - n (%)** |  |  |  |
| None | 49 (89.1) | 19 (82.6) | 30 (93.8) |
| Small (<2cm) | 4 (7.3) | 2 (8.7) | 2 (6.3) |
| >2cm without inferior vena cava involvement | 1 (1.8) | 1 (4.3) | 0 (0.0) |
| >2cm with inferior vena cava involvement | 1 (1.8) | 1 (4.3) | 0 (0.0) |
| **Hepatic vein tumor thrombus, dichotomized - n (%)** |  |  |  |
| Absent | 49 (89.1) | 19 (82.6) | 30 (93.8) |
| Present | 6 (10.9) | 4 (17.4) | 2 (6.3) |
| **Hepatic vein bland thrombus - n (%)** |  |  |  |
| None | 53 (96.4) | 23 (100.0) | 30 (68.8) |
| Small (<2cm) | 0 | 0 (0.0) | 0 (0.0) |
| >2cm without inferior vena cava involvement | 2 (3.6) | 0 (0.0) | 2 (6.3) |
| >2cm with inferior vena cava involvement | 0 | 0 (0.0) | 0 (0.0) |
| **Cavernous transformation - n (%)** |  |  |  |
| Absent | 49 (89.1) | 18 (78.3) | 31 (96.9) |
| Present | 6 (10.9) | 5 (21.7) | 1 (3.1) |
| **Nodular liver contours - n (%)** |  |  |  |
| Absent | 21 (38.2) | 11 (47.8) | 10 (31.3) |
| Present | 34 (61.8) | 12 (52.2) | 22 (68.8) |
| **Biliary dilatation or biliary stent - n (%)** |  |  |  |
| Absent | 40 (72.7) | 15 (65.2) | 25 (78.1) |
| Present | 15 (27.3) | 8 (34.8) | 7 (21.9) |
| **Portal vein diameter (cm)** | 1.5 (1.1-2.3; 0.2) | 1.5 (1.1-1.9; 0.2) | 1.5 (1.2-2.3; 0.3) |
| <1.5 cm | 34 (63.0) | 14 (60.9) | 20 (62.5) |
| >1.5 cm | 20 (37.0) | 8 (34.8) | 12 (37.5) |
| **TIPS - n (%)** |  |  |  |
| Absent | 54 (98.2) | 23 (100.0) | 31 (96.9) |
| Present | 1 (1.8) | 0 (0.0) | 1 (3.1) |
| **Spleen volume, cm3 (min-max; IQR)** | 506 (128-2176; 541) | 436 (128-1820; 609) | 562 (129-2176; 557) |
| <450 cm3 | 25 (45.5) | 13 (56.5) | 12 (37.5) |
| >450 cm3 | 30 (54.5) | 10 (43.5) | 20 (62.5) |
| **Recanalization of umbilical vein - n (%)** |  |  |  |
| Absent | 27 (49.1) | 10 (43.5) | 17 (53.1) |
| Present | 28 (50.9) | 13 (56.5) | 15 (46.9) |
| **Periesophageal varices - n (%)** |  |  |  |
| Absent | 23 (41.8) | 11 (47.8) | 12 (37.5) |
| Present | 32 (58.2) | 12 (52.2) | 20 (62.5) |
| **Splenorenal varices - n (%)** |  |  |  |
| Absent | 48 (87.3) | 21 (91.3) | 27 (84.4) |
| Present | 7 (12.7) | 2 (8.7) | 5 (15.6) |
| **Short axis of largest locoregional lymph node, median cm (min-max; IQR)** | 1.0 (0.3-4.8; 0.7) | 1.0 (0.5-4.8; 0.7) | 1.0 (0.3-4.1; 0.7) |
| <1.0 cm | 33 (60.0) | 13 (56.5) | 20 (62.5) |
| >1.0 cm | 22 (40.0) | 10 (43.5) | 12 (37.5) |
| **Heterogeneous locoregional lymph node - n (%)** |  |  |  |
| Absent | 47 (85.5) | 21 (91.3) | 26 (81.2) |
| Present | 8 (14.5) | 2 (8.7) | 6 (18.8) |
| **Heterogeneous retroperitoneal lymph node - n (%)** |  |  |  |
| Absent | 48 (87.3) | 20 (87.0) | 28 (87.5) |
| Present | 7 (12.7) | 3 (13.0) | 4 (12.5) |
| **Heterogeneous extra-abdominal lymph node - n (%)** |  |  |  |
| Absent | 50 (90.9) | 21 (91.3) | 29 (90.6) |
| Present | 5 (9.1) | 2 (8.7) | 3 (9.4) |
| **Non-nodal metastases - n (%)** |  |  |  |
| Absent | 39 (70.9) | 19 (82.6) | 20 (62.5) |
| Present | 16 (29.1) | 4 (17.4) | 12 (37.5) |
| **Metastases (nodal and non-nodal) - n (%)** |  |  |  |
| Absent | 37 (67.3) | 17 (73.9) | 20 (62.5) |
| Present | 18 (32.7) | 6 (26.1) | 12 (37.5) |
| **Parenchyma in phase/out of phase drop ratio, median % (min-max; IQR)** | 6.5 (-4.0-22.0; 8.8) | 7.0 (-1.0-8.0; 6.0) | 0.0 (-4.0-22.0; 22.0) |
| <=10% | 10 (83.3) | 7 (100.0) | 3 (60.0) |
| >10% | 2 (16.7) | 0 (0.0) | 2 (40.0) |
| **Tumor in/out of phase drop ratio, median % (min-max; IQR)** | 4.5 (-5.0-61.0; 10.0) | 4.0 (-5.0-61.0; 37.0) | 5.0 (1.0-10.0; 8.5) |
| <=10% | 8 (66.7) | 5 (71.4) | 3 (60.0) |
| >10% | 4 (33.3) | 2 (28.6) | 2 (40.0) |
| **AFP, median ng/dL (min-max; IQR)** | 349 (2.7-201700; 5695) | 954 (3.2-169990; 11385) | 27.5 (2.7-201700; 1327) |
| <=400 ng/dL | 28 (50.9) | 7 (30.4) | 21 (65.6) |
| >400 ng/dL | 27 (49.1) | 16 (69.6) | 11 (34.4) |
| **INR, median (min-max; IQR)** | 1.1 (0.9-1.96; 0.2) | 1.18 (0.99-1.96; 0.29) | 1.1 (0.9-1.7; 0.2) |
| <=1.5 | 53 (96.4) | 22 (95.7) | 31 (96.9) |
| >1.5 | 2 (3.6) | 1 (4.3) | 1 (3.1) |
| **Albumin, median g/dL (min-max; IQR)** | 3.6 (2.6-3.8; 0.7) | 3.6 (2.8-4.7; 0.7) | 3.6 (2.6-4.7; 0.6) |
| <3.5 g/dL | 27 (49.1) | 11 (47.8) | 16 (50.0) |
| >3.5 g/dL | 28 (50.9) | 12 (52.2) | 16 (50.0) |
| **Total bilirubin, median mg/dL (min-max; IQR)** | 0.8 (0.3-3.8; 0.6) | 0.8 (0.3-1.9; 0.6) | 0.9 (0.3-3.8; 0.8) |
| <2.0 mg/dL | 51 (92.7) | 23 (100.0) | 28 (87.5) |
| >2.0 mg/dL | 4 (7.3) | 0 (0.0) | 4 (12.5) |
| **Direct bilirubin, median mg/dL (min-max; IQR)** | 0.3 (0.1-2.8; 0.4) | 0.3 (0.1-1.0; 0.3) | 0.3 (0.1-2.8; 0.4) |
| <0.8 mg/dL | 49 (89.1) | 21 (91.3) | 28 (87.5) |
| >0.8 mg/dL | 6 (10.9) | 2 (8.7) | 4 (12.5) |
| **Hemoglobin, median g/dL (min-max; IQR)** | 13.0 (8.0-16.4; 3.0) | 13.0 (8.8-16.4; 2.8) | 13.0 (8.0-16.0; 3.1) |
| <12.0 g/dL | 20 (36.4) | 7 (30.4) | 13 (40.6) |
| >12.0 g/dL | 36 (63.6) | 16 (69.6) | 19 (59.4) |
| **Platelets, median x1000 (min-max; IQR)** | 161 (31-639; 188) | 224 (31-639; 202) | 152 (51-364, 91) |
| <150,000 | 23 (41.8) | 8 (34.8) | 15 (46.9) |
| >150,000 | 32 (58.2) | 15 (65.2) | 17 (53.1) |
| **Neutrophil to lymphocyte ratio, median x1000 (min-max; IQR)** | 3.98 (1.31-19.5; 3.13) | 2.8 (1.3-17.0; 2.2) | 4.5 (1.3-19.5; 3.2) |
| ≤3 | 21 (38.2) | 13 (56.5) | 8 (25.0) |
| >3 | 34 (61.8) | 10 (43.5) | 24 (75.0) |
| **Platelet to lymphocyte ratio, median x1000 (min-max; IQR)** | 176 (52-598; 146) | 174 (52-462; 154) | 191 (78-598; 168) |
| <230 | 36 (65.5) | 15 (65.2) | 21 (65.6) |
| ≥230 | 19 (34.5) | 8 (34.8) | 11 (34.4) |
| **MELD score, median (min-max; IQR)** | 9 (6-21; 3) | 9 (6-21; 2) | 9 (6-15; 3) |
| ≤9 | 36 (65.5) | 17 (73.9) | 19 (59.4) |
| >9 | 19 (34.5) | 6 (26.1) | 13 (40.6) |
| **ALBI score, median (min-max; IQR)** | -2.36 (-3.36--1.29; 0.72) | -2.40 (-3.36--1.47; 0.72) | - 2.33 (-3.25--1.29; 0.83) |
| ≤-2.6 (grade 1) | 17 (30.9) | 9 (39.1) | 8 (25.0) |
| > -2.6 (grade 2 and 3) | 38 (69.1) | 14 (60.9) | 24 (75.0) |

**Table S2:** Response assessment to atezolizumab-bevacizumab. IQR: interquartile range; RECIST: Response Evaluation Criteria in Solid Tumors; mRECIST: modified Response Evaluation Criteria in Solid Tumors.

| **Characteristics** | **Entire Cohort (n=55)** | **Treatment Naïve patients (n=23)** | **Patients who received prior treatment (n=32)** |
| --- | --- | --- | --- |
| **Follow-up duration, median months (min-max; IQR)** | 7.9 (1.0-46.6; 10.0) | 7.4 (1.0-26.9; 7.3) | 9.2 (1.6-46.6; 9.4) |
| **Progression - n (%)** |  |  |  |
| Absent | 10 (18.2) | 5 (21.7) | 5 (15.6) |
| Present | 45 (81.8) | 18 (78.3) | 27 (84.4) |
| **Cause of progression - n (%)** |  |  |  |
| Toxicity/lack of tolerance | 9 (16.4) | 6 (26.1) | 3 (9.4) |
| Radiologic progression | 31 (56.4) | 11 (47.8) | 20 (62.5) |
| Death | 5 (9.1) | 1 (4.3) | 4 (12.5) |
| No progression | 10 (18.2) | 5 (21.7) | 5 (15.6) |
| **Progression free survival, median months (min-max; IQR)** | 3.0 (0.3-26.9; 6.1) | 2.8 (0.3-26.9; 6.1) | 3.9 (0.6-16.0; 6.1) |
| 3-month progression-free survival (%) | 50.1 | 43.5 | 56.3 |
| 6-month progression-free survival (%) | 41.2 | 38.6 | 43.3 |
| 12-month progression-free survival (%) | 20.1 | 24.8 | 17.3 |
| **Overall survival, median months (min-max; IQR)** | 7.9 (1.0-46.6; 10.0) | 7.4 (1.0-26.9; 7.3) | 9.2 (1.6-46.6; 9.4) |
| 3-month overall survival (%) | 85.5 | 83.0 | 93.8 |
| 6-month overall survival (%) | 79.8 | 64.7 | 90.6 |
| 12-month overall survival (%) | 45.7 | 33.6 | 53.9 |
| **Best overall response RECIST 1.1 - n (%)** |  |  |  |
| Progressive disease | 21 (38.2) | 8 (34.8) | 13 (40.6) |
| Stable disease | 12 (21.8) | 4 (17.4) | 8 (25.0) |
| Partial Response | 15 (27.3) | 7 (30.4) | 8 (25.0) |
| Complete response | 0 (0.0) | 0 (0.0) | 0 (0.0) |
| Could not be evaluated | 7 (12.7) | 4 (17.4) | 3 (9.4) |
| **Best overall response mRECIST - n (%)** |  |  |  |
| Progressive disease | 21 (38.2) | 8 (34.8) | 13 (40.6) |
| Stable disease | 12 (21.8) | 4 (17.4) | 8 (25.0) |
| Partial Response | 13 (23.6) | 6 (26.1) | 7 (21.9) |
| Complete response | 2 (3.6) | 1 (4.3) | 1 (3.1) |
| Could not be evaluated | 7 (12.7) | 4 (17.4) | 3 (9.4) |
| **Death at last follow up- n (%)** |  |  |  |
| Alive at last follow up | 22 (40.0) | 8 (34.8) | 14 (43.8) |
| Died during follow up | 33 (60.0) | 15 (65.2) | 18 (56.3) |

**Table S3**: Univariate and multivariate analyses for progression free survival of the entire cohort. Statistically significant variables (p<0.05) were marked in bold. ALBI score: Albumin-Bilirubin score; AFP: alpha-fetoprotein; INR: international normalized ratio; IQR: interquartile range; MELD: model for end-stage liver disease; THID: transient hepatic intensity differences; THAD: transient hepatic attenuation differences; TIPS: transjugular intrahepatic portosystemic shunt.

|  | **Entire Cohort (n=55)** | | | | |
| --- | --- | --- | --- | --- | --- |
| **Progression free survival** | | | | |
| **Univariate analysis** | | | **Multivariate analysis** | |
| **Characteristics** | **Censored, n (%)** | **Median (95% CI), months** | **p-value** | **HR (95% CI)** | **p-value** |
| **Age - median year** |  |  |  |  |  |
| ≤65 | 6 (25.0) | 2.8 (2.4-3.2) | 0.502 |  |  |
| >65 | 4 (12.9) | 6.0 (1.7-10.3) |  |  |  |
| **Gender** |  |  |  |  |  |
| Female | 4 (40.0) | 3.2 (0.0-6.5) | 0.187 |  |  |
| Male | 6 (13.3) | 3.0 (1.1-4.9) |  |  |  |
| **Prior treatment** |  |  |  |  |  |
| No | 5 (21.7) | 2.8 (2.2-3.4) | 0.832 |  |  |
| Yes | 5 (15.6) | 3.2 (0.0-7.2) |  |  |  |
| **Locoregional therapy to extra-hepatic metastases while on atezolizumab-bevacizumab** |  |  |  |  |  |
| No | 9 (18.8) | 3.0 (0.9-5.1) | 0.835 |  |  |
| Yes | 1 (14.3) | 3.2 (2.2-4.2) |  |  |  |
| **Ascites** |  |  |  |  |  |
| None | 7 (18.9) | 6.3 (1.2-11.4) | **0.005** | 1.34 (0.36-5.05) | 0.663 |
| Mild | 3 (16.7) | 2 (0.3-3.7) |  |  |  |
| **Pleural effusion** |  |  |  |  |  |
| None | 10 (20.0) | 3.2 (0.0-6.7) | **0.022** | 6.3 (1.03-38.90) | **0.047** |
| Mild | 0 (0.0) | 0.9 (0.3-1.5) |  |  |  |
| **Largest intrahepatic tumor diameter** |  |  |  |  |  |
| ≤7 cm | 6 (21.4) | 3.2 (0.5-5.8) | 0.689 |  |  |
| >7 cm | 4 (16.0) | 3.0 (1.7-4.3) |  |  |  |
| **Number of intra-hepatic disease foci grouped** |  |  |  |  |  |
| 0-3 | 2 (22.2) | 6.5 (0.0-13.0) | 0.734 |  |  |
| ≥4 | 8 (17.4) | 2.8 (1.1-4.5) |  |  |  |
| **Tumor margin** |  |  |  |  |  |
| Well-demarcated | 6 (27.3) | 4.6 (0.0-17.9) | **0.017** | 0.96 (0.25-3.61) | 0.946 |
| Irregular/infiltrative | 4 (12.9) | 2.8 (2.5-3.1) |  |  |  |
| **Enhancing capsule** |  |  |  |  |  |
| Absent | 7 (18.4) | 2.8 (2.4-3.2) | 0.21 |  |  |
| Present | 3 (20.0) | 8.9 (0.0-19.8) |  |  |  |
| **THID/THAD** |  |  |  |  |  |
| Absent | 7 (15.2) | 3.0 (1.0-5.0) | 0.788 |  |  |
| Present | 3 (42.9) | 3.2 (2.2-4.2) |  |  |  |
| **Necrosis** |  |  |  |  |  |
| Absent | 5 (33.3) | 3.0 (0.0-6.3) | 0.586 |  |  |
| Present | 5 (13.2) | 3.1 (0.8-1.6) |  |  |  |
| **Extracapsular extension** |  |  |  |  |  |
| Absent | 9 (23.1) | 2.8 (0.2-5.4) | 0.713 |  |  |
| Present | 1 (7.1) | 3.1 (2.7-3.5) |  |  |  |
| **Liver parenchyma pre-contrast density** |  |  |  |  |  |
| ≤45 | 0 (0.0) | 2.7 (0.0-7.8) | 0.336 |  |  |
| >45 | 6 (24.0) | 3.0 (2.5-3.5) |  |  |  |
| **Tumor pre-contrast density** |  |  |  |  |  |
| <40 | 1 (5.9) | 2.8 (2.3-3.3) | **0.037** | 0.55 (0.19-1.62) | 0.279 |
| ≥40 | 5 (29.4) | 4.9 (0.0-14.5) |  |  |  |
| **Tumor arterial phase density** |  |  |  |  |  |
| ≤100 | 1 (5.3) | 2.7 (2.1-3.3) | **0.012** | 0.51 (0.13-1.92) | 0.317 |
| >100 | 5 (33.3) | 7.2 (0.0-17.6) |  |  |  |
| **Tumor portal phase** |  |  |  |  |  |
| ≤100 | 1 (5.9) | 2.7 (2.3-3.1) | 0.098 |  |  |
| >100 | 5 (29.4) | 4.9 (0.7-9.1) |  |  |  |
| **Tumor delayed phase** |  |  |  |  |  |
| ≤100 | 6 (20.0) | 2.8 (2.3-3.3) | 0.565 |  |  |
| >100 | 0 (0.0) | 2.7 (0.0-5.9) |  |  |  |
| **Portal vein tumor thrombus** |  |  |  |  |  |
| None | 3 (8.8) | 4.5 (0.3-8.7) | **0.006** |  |  |
| Small (<2cm) | 4 (66.7) | - |  |  |  |
| >2cm without main portal vein involvement | 3 (30.0) | 1.4 (0.1-2.7) |  |  |  |
| >2cm with main portal vein involvement | 0 (0.0) | 1.6 (0.0-3.3) |  |  |  |
| **Portal vein tumor thrombus, dichotomized** |  |  |  |  |  |
| None or <2cm | 7 (17.5) | 4.9 (0.4-9.4) | **0.044** | 0.12 (0.05-1.39) | 0.117 |
| > 2cm with or without main portal vein involvement | 3 (20.0) | 1.6 (0.4-2.8) |  |  |  |
| **Portal vein bland thrombus** |  |  |  |  |  |
| None | 9 (17.6) | - | 0.719 |  |  |
| Small (<2cm) | 0 (0.0) | - |  |  |  |
| >2cm without main portal vein involvement | 1 (100.0) | - |  |  |  |
| >2cm with main portal vein involvement | - |  |  |  |  |
| **Hepatic vein tumor thrombus** |  |  |  |  |  |
| None | 10 (20.4) | 4.9 (1.4-8.4) | **<0.001** |  |  |
| Small (<2cm) | 0 (0.0) | 0.4 (0.0-1.4) |  |  |  |
| >2cm without inferior vena cava involvement | 0 (0.0) | - |  |  |  |
| >2cm with inferior vena cava involvement | 0 (0.0) | - |  |  |  |
| **Hepatic vein tumor thrombus, dichotomized** |  |  |  |  |  |
| Absent | 10 (20.4) | 4.9 (1.4-8.4) | **<0.001** | 23.37 (2.63-207.67) | **0.005** |
| Present | 6 (0.0) | 0.7 (0.1-1.3) |  |  |  |
| **Hepatic vein bland thrombus** |  |  |  |  |  |
| None | 9 (17.0) | 3.1 (1.5-4.6) | 0.642 |  |  |
| Small (<2cm) | 0 (0.0) | - |  |  |  |
| >2cm without inferior vena cava involvement | 1 (50.0) | - |  |  |  |
| >2cm with inferior vena cava involvement | 0 (0.0) | - |  |  |  |
| **Cavernous transformation** |  |  |  |  |  |
| Absent | 10 (20.4) | 4.9 (0.7-9.1) | **0.001** | 1.36 (0.16-11.72) | 0.779 |
| Present | 0 (0.0) | 0.8 (0.0-1.9) |  |  |  |
| **Nodular liver contours** |  |  |  |  |  |
| Absent | 4 (19.0) | 2.8 (1.6-4.0) | 0.864 |  |  |
| Present | 6 (17.6) | 3.2 (0.3-6.0) |  |  |  |
| **Biliary dilatation or biliary stent** |  |  |  |  |  |
| Absent | 6 (15.0) | 3.2 (0.0-8.0) | 0.632 |  |  |
| Present | 4 (26.7) | 2.8 (1.8-3.8) |  |  |  |
| **Portal vein diameter** |  |  |  |  |  |
| <1.5 cm | 6 (17.6) | 4.5 (0.2-8.8) | 0.363 |  |  |
| >1.5 cm | 4 (20.0) | 2.8 (2.4-3.2) |  |  |  |
| **Spleen volume** |  |  |  |  |  |
| <450 cm3 | 7 (28.0) | 7.7 (0.4-15.0) | **0.014** | 4.12 (0.97-17.56) | 0.056 |
| >450 cm3 | 3 (10.0) | 2.8 (2.4-3.2) |  |  |  |
| **Recanalization of umbilical vein** |  |  |  |  |  |
| Absent | 6 (22.2) | 6.0 (1.1-10.9) | 0.138 |  |  |
| Present | 4 (14.3) | 2.8 (1.9-3.7) |  |  |  |
| **Periesophageal varices** |  |  |  |  |  |
| Absent | 5 (21.7) | 6.5 (3.4-9.6) | 0.142 |  |  |
| Present | 5 (15.6) | 2.8 (2.4-3.2) |  |  |  |
| **Splenorenal varices** |  |  |  |  |  |
| Absent | 9 (18.8) | 3 (1.5-4.5) | 0.436 |  |  |
| Present | 1 (14.3) | 11.3 (0.0-33.4) |  |  |  |
| **Short axis of largest locoregional lymph node** |  |  |  |  |  |
| <1.0 cm | 6 (18.2) | 4.5 (0.9-8.1) | 0.148 |  |  |
| >1.0 cm | 4 (18.2) | 2.8 (1.5-4.1) |  |  |  |
| **Heterogeneous locoregional lymph node** |  |  |  |  |  |
| Absent | 9 (19.1) | 3.1 (1.0-5.2) | 0.304 |  |  |
| Present | 1 (12.5) | 2.8 (1.1-4.5) |  |  |  |
| **Heterogeneous retroperitoneal lymph node** |  |  |  |  |  |
| Absent | 9 (18.8) | 3.1 (0.0-6.2) | 0.523 |  |  |
| Present | 1 (14.3) | 2.8 (1.8-3.8) |  |  |  |
| **Heterogeneous extra-abdominal lymph node** |  |  |  |  |  |
| Absent | 10 (20.0) | 4.5 (0.9-8.1) | **0.016** | 0.84 (0.12-5.79) | 0.859 |
| Present | 0 (0.0) | 2.0 (0.7-3.3) |  |  |  |
| **Non-nodal metastases** |  |  |  |  |  |
| Absent | 9 (23.1) | 4.9 (0.7-9.0) | 0.065 |  |  |
| Present | 1 (6.3) | 2.4 (1.4-3.4) |  |  |  |
| **Metastases (nodal and non-nodal)** |  |  |  |  |  |
| Absent | 9 (24.3) | 4.9 (0.9-8.9) | 0.095 |  |  |
| Present | 1 (5.6) | 2.8 (2.0-3.6) |  |  |  |
| **Parenchyma in phase/out of phase drop ratio** |  |  |  |  |  |
| <=10% | 2 (20.0) | 2.8 (0.0-7.8) | 0.274 |  |  |
| >10% | 1 (50.0) | 15.4 (N/A) |  |  |  |
| **Tumor in/out of phase drop ratio** |  |  |  |  |  |
| <=10% | 3 (37.5) | 15.4 (1.2-29.6) | **0.047** |  |  |
| >10% | 0 (0.0) | 0.8 (0.0-3.0) |  |  |  |
| **AFP** |  |  |  |  |  |
| <=400 ng/dL | 5 (17.9) | 6.0 (0.7-11.3) | 0.285 |  |  |
| >400 ng/dL | 5 (18.5) | 2.8 (2.6-3.0) |  |  |  |
| **INR** |  |  |  |  |  |
| <=1.5 | 10 (18.9) | 3.1 (1.5-4.7) | 0.393 |  |  |
| >1.5 | 0 (0.0) | 0.7 (N/A) |  |  |  |
| **Albumin** |  |  |  |  |  |
| <3.5 g/dL | 3 (11.1) | 2.8 (2.1-3.5) | **0.002** |  |  |
| >3.5 g/dL | 7 (25.0) | 6.5 (0.1-12.9) |  |  |  |
| **Total bilirubin** |  |  |  |  |  |
| <2.0 mg/dL | 8 (15.7) | 3.0 (2.4-3.6) | 0.486 |  |  |
| >2.0 mg/dL | 2 (50.0) | 6.3 (N/A) |  |  |  |
| **Direct bilirubin** |  |  |  |  |  |
| <0.8 mg/dL | 9 (18.4) | 3.2 (0.4-6.0) | 0.174 |  |  |
| >0.8 mg/dL | 1 (16.7) | 1.6 (0.0-4.0) |  |  |  |
| **Hemoglobin** |  |  |  |  |  |
| <12.0 g/dL | 3 (15.0) | 2.8 (2.2-3.4) | 0.078 |  |  |
| >12.0 g/dL | 7 (20.0) | 4.9 (2.0-7.8) |  |  |  |
| **Platelets** |  |  |  |  |  |
| <150,000 | 3 (13.0) | 4.9 (0.6-9.2) | 0.736 |  |  |
| >150,000 | 7 (21.9) | 2.8 (2.1-3.5) |  |  |  |
| **Neutrophil to lymphocyte ratio** |  |  |  |  |  |
| ≤3 | 4 (19.0) | 7.3 (3.6-10.9) | **0.042** | 1.28 (0.32-5.20) | 0.726 |
| >3 | 6 (17.6) | 2.8 (2.3-3.3) |  |  |  |
| **Platelet to lymphocyte ratio** |  |  |  |  |  |
| <230 | 7 (19.4) | 6.3 (3.2-9.4) | **0.033** | 2.40 (0.40-14.34) | 0.337 |
| ≥230 | 3 (15.8) | 2.4 (2.0-2.8) |  |  |  |
| **MELD score** |  |  |  |  |  |
| ≤9 | 7 (19.4) | 3.0 (2.5-3.5) | 0.275 |  |  |
| >9 | 3 (15.8) | 4.9 (0.6-9.2) |  |  |  |
| **ALBI score** |  |  |  |  |  |
| ≤-2.6 (grade 1) | 5 (29.4) | 8.6 (0.0-19.5) | **0.010** | 0.47 (0.09-2.42) | 0.363 |
| > -2.6 (grade 2 and 3) | 5 (13.2) | 2.8 (2.3-3.3) |  |  |  |

**Table S4:** Univariate and multivariate analyses of overall survival for the entire cohort. Statistically significant variables (p<0.05) were marked in bold. ALBI score: Albumin-Bilirubin score; AFP: alpha-fetoprotein; INR: international normalized ratio; IQR: interquartile range; MELD: model for end-stage liver disease; THID: transient hepatic intensity differences; THAD: transient hepatic attenuation differences.

|  | **Overall survival of the entire cohort (n=55)** | | | | |
| --- | --- | --- | --- | --- | --- |
| **Univariate analysis** | | | **Multivariate analysis** | |
| **Characteristics** | **Censored, n (%)** | **Median (95% CI), months** | **p-value** | **HR (95% CI)** | **p-value** |
| **Age - median year** |  |  |  |  |  |
| ≤65 | 10 (41.7) | 9.4 (7.3-11.5) | 0.562 |  |  |
| >65 | 12 (38.7) | 12.3 (3.9-20.7) |  |  |  |
| **Gender** |  |  |  |  |  |
| Female | 6 (60) | 15.5 (7.0-24.0) | 0.337 |  |  |
| Male | 16 (35.6) | 9.4 (5.7-13.1) |  |  |  |
| **Prior treatment** |  |  |  |  |  |
| No | 8 (34.8) | 8.2 (6.6-9.8) | 0.155 |  |  |
| Yes | 14 (43.8) | 12.3 (9.0-15.6) |  |  |  |
| **Locoregional therapy to extra-hepatic metastases while on atezolizumab-bevacizumab** |  |  |  |  |  |
| No | 19 (39.6) | 10.6 (7.2-14.0) | 0.820 |  |  |
| Yes | 3 (42.9) | 8.2 (0.9-15.5) |  |  |  |
| **Ascites** |  |  |  |  |  |
| None | 17 (45.9) | 12.8 (7.1-18.5) | **<0.001** | 34.37 (2.53-467.64) | **0.008** |
| Mild | 5 (27.8) | 7.3 (1.2-13.4) |  |  |  |
| **Pleural effusion** |  |  |  |  |  |
| None | 21 (42.0) | 12.3 (8.6-16.0) | **0.015** | 110.17 (5.00-2426.54) | **0.003** |
| Mild | 1 (20.0) | 7.7 (2.1-13.3) |  |  |  |
| **Largest intrahepatic tumor diameter** |  |  |  |  |  |
| ≤7 cm | 15 (53.6) | 15.5 (12.6-18.4) | **0.016** | 0.34 (0.01-11.05) | 0.542 |
| >7 cm | 5 (20.0) | 8.9 (7.3-10.5) |  |  |  |
| **Number of intra-hepatic disease foci** |  |  |  |  |  |
| 0-3 | 8 (88.9) | N/A | **0.042** | N/A | 0.979 |
| ≥4 | 14 (30.4) | 9.4 (6.7-12.1) |  |  |  |
| **Tumor margin** |  |  |  |  |  |
| Well-demarcated | 12 (54.5) | 19.2 (14.7-23.7) | **<0.001** | 6.11 (0.13-282.3) | 0.355 |
| Irregular/infiltrative | 8 (25.8) | 7.9 (6.9-8.9) |  |  |  |
| **Enhancing capsule** |  |  |  |  |  |
| Absent | 14 (36.8) | 9.0 (7.4-10.6) | **0.032** | 0.34 (0.01-11.01) | 0.542 |
| Present | 6 (40.0) | 18.7 (12.6-24.8) |  |  |  |
| **THID/THAD** |  |  |  |  |  |
| Absent | 17 (37.0) | 10.0 (6.7-13.3) | 0.555 |  |  |
| Present | 3 (42.9) | 9.4 (0.7-18.1) |  |  |  |
| **Necrosis** |  |  |  |  |  |
| Absent | 8 (53.3) | 10.0 (N/A) | 0.434 |  |  |
| Present | 12 (31.6) | 10.6 (7.7-13.5) |  |  |  |
| **Extracapsular extension** |  |  |  |  |  |
| Absent | 16 (41.0) | 9.4 (6.5-12.3) | 0.762 |  |  |
| Present | 4 (28.6) | 12.3 (6.8-17.8) |  |  |  |
| **Liver parenchyma pre-contrast density** |  |  |  |  |  |
| ≤45 HU | 2 (20.0) | 10.0 (1.3-18.7) | 0.190 |  |  |
| >45 | 10 (40.0) | 9.4 (6.2-12.6) |  |  |  |
| **Tumor pre-contrast density** |  |  |  |  |  |
| <40 | 5 (29.4) | 8.9 (6.3-11.5) | **0.046** | 0.09 (0.02-0.53) | **0.007** |
| ≥40 | 7 (41.2) | 11.3 (0.0-24.1) |  |  |  |
| **Tumor arterial phase density** |  |  |  |  |  |
| ≤100 | 6 (31.6) | 8.9 (6.3-11.5) | 0.082 |  |  |
| >100 | 6 (40.0) | 12.3 (0.7-23.9) |  |  |  |
| **Tumor portal phase** |  |  |  |  |  |
| ≤100 | 6 (35.3) | 9.4 (5.3-13.5) | 0.801 |  |  |
| >100 | 6 (35.3) | 9.0 (7.0-11.0) |  |  |  |
| **Tumor delayed phase** |  |  |  |  |  |
| ≤100 | 11 (36.7) | 9.4 (5.6-13.2) | 0.924 |  |  |
| >100 | 1 (25.0) | 8.9 (0.7-17.1) |  |  |  |
| **Portal vein tumor thrombus** |  |  |  |  |  |
| None | 12 (35.3) | 12.3 (8.6-16.0) | **0.003** |  |  |
| Small (<2cm) | 4 (66.7) | - |  |  |  |
| >2cm without main portal vein involvement | 5 (50.0) | 8.9 (7.0-10.8) |  |  |  |
| >2cm with main portal vein involvement | 1 (20.0) | 2.7 (0.0-5.5) |  |  |  |
| **Portal vein tumor thrombus, dichotomized** |  |  |  |  |  |
| None or <2cm | 16 (40.0) | 12.8 (7.4-18.2) | **0.012** | 1.52 (0.14-16.07) | 0.727 |
| > 2cm with or without main portal vein involvement | 6 (40.0) | 7.9 (1.9-14.0) |  |  |  |
| **Portal vein bland thrombus** |  |  |  |  |  |
| None | 21 (41.2) | - | 0.361 |  |  |
| Small (<2cm) | 0 (0.0) | - |  |  |  |
| >2cm without main portal vein involvement | - | - |  |  |  |
| >2cm with main portal vein involvement | 1 (100.0) | - |  |  |  |
| **Hepatic vein tumor thrombus** |  |  |  |  |  |
| None | 20 (40.8) | - | **<0.001** |  |  |
| Small (<2cm) | 1 (25.0) | - |  |  |  |
| >2cm without inferior vena cava involvement | 1 (100.0) | - |  |  |  |
| >2cm with inferior vena cava involvement | 0 | - |  |  |  |
| **Hepatic vein tumor thrombus, dichotomized** |  |  |  |  |  |
| Absent | 20 (40.8) | 11.3 (7.6-15.0) | **0.003** | 7.48 (0.30-188.2) | 0.222 |
| Present | 2 (33.3) | 2.8 (0.8-4.8) |  |  |  |
| **Hepatic vein bland thrombus** |  |  |  |  |  |
| None | 20 (37.7) | - | 0.337 |  |  |
| Small (<2cm) | - | - |  |  |  |
| >2cm without inferior vena cava involvement | 2 (100.0) | - |  |  |  |
| >2cm with inferior vena cava involvement | - | - |  |  |  |
| **Cavernous transformation** |  |  |  |  |  |
| Absent | 21 (42.9) | 11.3 (7.6-15.0) | **<0.001** | 0.30 (0.01-11.36) | 0.515 |
| Present | 1 (16.7) | 1.4 (0.0-3.2) |  |  |  |
| **Nodular liver contours** |  |  |  |  |  |
| Absent | 11 (52.4) | 11.3 (6.0-16.6) | 0.239 |  |  |
| Present | 11 (32.4) | 10.0 (7.5-12.5) |  |  |  |
| **Biliary dilatation or biliary stent** |  |  |  |  |  |
| Absent | 17 (42.5) | 12.8 (7.8-17.8) | **0.021** | 2.60 (0.22-31.34) | 0.452 |
| Present | 5 (33.3) | 6.3 (0.0-13.1) |  |  |  |
| **Portal vein diameter** |  |  |  |  |  |
| <1.5 cm | 12 (35.4) | 12.3 (7.6-17.0) | 0.454 |  |  |
| >1.5 cm | 10 (50.0) | 7.9 (4.2-11.6) |  |  |  |
| **Spleen volume, cm3** |  |  |  |  |  |
| <450 cm3 | 14 (56.0) | 18.7 (9.1-28.3) | **0.002** | 6.91 (0.68-69.79) | 0.101 |
| >450 cm3 | 8 (26.7) | 7.7 (7.0-8.4) |  |  |  |
| **Recanalization of umbilical vein** |  |  |  |  |  |
| Absent | 14 (51.9) | 14.8 (8.0-21.6) | **0.005** | 4.44 (0.71-27.97) | 0.112 |
| Present | 8 (28.6) | 7.9 (5.3-10.5) |  |  |  |
| **Periesophageal varices** |  |  |  |  |  |
| Absent | 12 (52.2) | 11.3 (8.5-14.1) | 0.097 |  |  |
| Present | 10 (31.3) | 8.9 (6.9-10.9) |  |  |  |
| **Splenorenal varices** |  |  |  |  |  |
| Absent | 19 (39.6) | 9.4 (6.9-11.9) | 0.222 |  |  |
| Present | 3 (42.9) | 18.7 (8.6-28.8) |  |  |  |
| **Short axis of largest locoregional lymph node** |  |  |  |  |  |
| <1.0 cm | 15 (45.5) | 12.3 (6.9-17.7) | **0.039** | 0.49 (0.05-4.42) | 0.521 |
| >1.0 cm | 7 (31.8) | 7.7 (5.5-9.9) |  |  |  |
| **Heterogeneous locoregional lymph node** |  |  |  |  |  |
| Absent | 19 (40.4) | 11.3 (7.3-15.3) | 0.427 |  |  |
| Present | 3 (37.5) | 7.7 (4.5-10.9) |  |  |  |
| **Heterogeneous retroperitoneal lymph node** |  |  |  |  |  |
| Absent | 20 (41.7) | 10.6 (6.9-14.3) | 0.617 |  |  |
| Present | 2 (28.6) | 8.2 (7.1-9.3) |  |  |  |
| **Heterogeneous extra-abdominal lymph node** |  |  |  |  |  |
| Absent | 20 (40.0) | 11.3 (7.7-14.9) | 0.226 |  |  |
| Present | 2 (40.0) | 7.7 (7.1-8.3) |  |  |  |
| **Non-nodal metastases** |  |  |  |  |  |
| Absent | 16 (41.0) | 11.3 (7.3-15.3) | 0.678 |  |  |
| Present | 6 (37.5) | 10.6 (7.1-14.1) |  |  |  |
| **Metastases (nodal and non-nodal)** |  |  |  |  |  |
| Absent | 16 (43.2) | 11.3 (7.0-15.6) | 0.647 |  |  |
| Present | 6 (33.3) | 10.6 (6.7-14.5) |  |  |  |
| **Parenchyma in phase/out of phase drop ratio** |  |  |  |  |  |
| <=10% | 4 (40.0) | - | 0.160 |  |  |
| >10% | 2 (100.0) | - |  |  |  |
| **Tumor in/out of phase drop ratio** |  |  |  |  |  |
| <=10% | 5 (62.5) | 14.8 (N/A-N/A) | 0.221 |  |  |
| >10% | 1 (25.0) | 7.9 (0.0-17.6) |  |  |  |
| **AFP** |  |  |  |  |  |
| <=400 ng/dL | 12 (42.9) | 12.8 (7.7-17.9) | 0.066 |  |  |
| >400 ng/dL | 10 (37.0) | 9.0 (6.4-11.6) |  |  |  |
| **INR** |  |  |  |  |  |
| <=1.5 | 22 (41.5) | 10.6 (6.5-14.7) | 0.212 |  |  |
| >1.5 | 0 (0.0) | 1.2 (N/A-N/A) |  |  |  |
| **Albumin** |  |  |  |  |  |
| <3.5 g/dL | 6 (22.2) | 7.7 (5.8-9.6) | **<0.001** |  |  |
| >3.5 g/dL | 16 (57.1) | 18.7 (14.6-22.8) |  |  |  |
| **Total bilirubin** |  |  |  |  |  |
| <2.0 mg/dL | 19 (37.3) | 10.6 (6.9-14.3) | 0.955 |  |  |
| >2.0 mg/dL | 3 (75.0) | 6.3 (N/A-N/A) |  |  |  |
| **Direct bilirubin** |  |  |  |  |  |
| <0.8 mg/dL | 20 (40.8) | 11.3 (7.7-14.9) | **0.001** | 5.69 (0.09-362.51) | 0.412 |
| >0.8 mg/dL | 2 (33.3) | 1.6 (0.0-4.5) |  |  |  |
| **Hemoglobin** |  |  |  |  |  |
| <12.0 g/dL | 7 (35.0) | 7.9 (7.6-8.2) | **0.011** | 5.04 (0.40-63.19) | 0.210 |
| >12.0 g/dL | 15 (42.9) | 14.8 (6.4-23.2) |  |  |  |
| **Platelets** |  |  |  |  |  |
| <150,000 | 8 (34.8) | 10.0 (6.7-13.3) | 0.668 |  |  |
| >150,000 | 14 (43.8) | 10.6 (5.7-15.5) |  |  |  |
| **Neutrophil to lymphocyte ratio** |  |  |  |  |  |
| ≤3 | 8 (38.1) | 14.8 (3.5-26.1) | 0.175 |  |  |
| >3 | 14 (41.2) | 9.4 (3.6-13.2) |  |  |  |
| **Platelet to lymphocyte ratio** |  |  |  |  |  |
| <230 | 14 (38.9) | 11.3 (4.7-17.9) | 0.279 |  |  |
| ≥230 | 8 (42.1) | 7.9 (3.1-12.7) |  |  |  |
| **MELD score** |  |  |  |  |  |
| ≤9 | 15 (41.7) | 12.8 (3.2-22.4) | **0.045** |  |  |
| >9 | 7 (36.8) | 8.9 (5.8-12.0) |  |  |  |
| **ALBI score** |  |  |  |  |  |
| ≤-2.6 (grade 1) | 11 (64.7) | 19.2 (18.1-20.3) | **<0.001** | 1.23 (0.05-29.47) | 0.898 |
| > -2.6 (grade 2 and 3) | 11 (28.9) | 7.9 (6.4-9.4) |  |  |  |

**Table S5**: Univariate and multivariate analyses of progression free survival for treatment naïve patients (n=23). Statistically significant variables (p<0.05) were marked in bold. ALBI score: Albumin-Bilirubin score; AFP: alpha-fetoprotein; INR: international normalized ratio; IQR: interquartile range; MELD: model for end-stage liver disease; THID: transient hepatic intensity differences; THAD: transient hepatic attenuation differences.

|  | **Univariate analysis** | | | **Multivariate analysis** | |
| --- | --- | --- | --- | --- | --- |
| **Characteristics** | **Censored, n (%)** | **Median (95% CI), months** | **p-value** | **HR (95% CI)** | **p-value** |
| **Age - year** |  |  |  |  |  |
| ≤65 | 3 (25.0) | 2.7 (1.3-4.1) | 0.371 |  |  |
| >65 | 2 (18.2) | 7.3 (0.0-14.9) |  |  |  |
| **Gender** |  |  |  |  |  |
| Female | 3 (42.9) | 4.9 (0.0-10.3) | 0.161 |  |  |
| Male | 2 (12.5) | 2.3 (0.3-4.3) |  |  |  |
| **Locoregional therapy to extra-hepatic metastases while on atezolizumab-bevacizumab** |  |  |  |  |  |
| No | 5 (25.0) | 2.7 (1.6-3.8) | 0.668 |  |  |
| Yes | 0 (0.0) | 2.8 (2.2-3.4) |  |  |  |
| **Ascites** |  |  |  |  |  |
| None | 3 (21.4) | 2.8 (0.1-5.5) | 0.080 |  |  |
| Mild | 2 (22.2) | 1.3 (0.0-2.8) |  |  |  |
| **Pleural effusion** |  |  |  |  |  |
| None | 5 (23.8) | 2.8 (0.0-6.0) | **0.048** | 0.00 (0->1000) | 0.947 |
| Mild | 0 (0.0) | 0.3 (N/A) |  |  |  |
| **Largest intrahepatic tumor diameter** |  |  |  |  |  |
| ≤7 cm | 2 (25.0) | 2.8 (0.0-11.4) | 0.513 |  |  |
| >7 cm | 3 (20.0) | 2.3 (0.5-4.1) |  |  |  |
| **Number of intra-hepatic disease foci** |  |  |  |  |  |
| 0-3 | 0 (0.0) | 18.1 (N/A) | 0.372 |  |  |
| ≥4 | 5 (22.7) | 2.7 (2.1-3.3) |  |  |  |
| **Tumor margin** |  |  |  |  |  |
| Well-demarcated | 3 (33.3) | 12.0 (0.0-28.1) | **0.028** | 4.08 (0.06-263.30) | 0.508 |
| Irregular/infiltrative | 2 (14.3) | 2.4 (0.0-4.8) |  |  |  |
| **Enhancing capsule** |  |  |  |  |  |
| Absent | 4 (23.5) | 2.8 (2.3-3.3) | 0.645 |  |  |
| Present | 1 (16.7) | 1.6 (0.0-14.4) |  |  |  |
| **THID/THAD** |  |  |  |  |  |
| Absent | 4 (20.0) | 2.8 (2.6-3.0) | 0.534 |  |  |
| Present | 1 (33.3) | 0.8 (0.6-1.0) |  |  |  |
| **Necrosis** |  |  |  |  |  |
| Absent | 2 (33.3) | 2.7 (0.0-7.6) | 0.935 |  |  |
| Present | 3 (17.6) | 2.8 (2.1-3.5) |  |  |  |
| **Extracapsular extension** |  |  |  |  |  |
| Absent | 4 (22.2) | 2.4 (1.6-3.2) | 0.132 |  |  |
| Present | 1 (20.0) | 12.0 (0.0-31.8) |  |  |  |
| **Liver parenchyma pre-contrast density** |  |  |  |  |  |
| ≤45 HU | 0 (0.0) | 2.7 (0.3-5.1) | 0.471 |  |  |
| >45 HU | 3 (37.5) | 2.4 (1.7-3.1) |  |  |  |
| **Tumor pre-contrast density** |  |  |  |  |  |
| <40 HU | 1 (20.0) | 2.7 (2.1-3.3) | 0.796 |  |  |
| ≥40 HU | 2 (25.0) | 2.3 (0.0-7.2) |  |  |  |
| **Tumor arterial phase density** |  |  |  |  |  |
| ≤100 HU | 0 (0.0) | 2.3 (0.8-3.8) | **0.022** | 0.00 (0->1000) | 0.931 |
| >100 HU | 3 (37.5) | 4.9 (0.0-18.0) |  |  |  |
| **Tumor portal phase** |  |  |  |  |  |
| ≤100 HU | 1 (14.3) | 2.4 (2.1-2.7) | 0.221 |  |  |
| >100 HU | 2 (33.3) | 4.9 (0.0-19.9) |  |  |  |
| **Tumor delayed phase** |  |  |  |  |  |
| ≤100 HU | 3 (25.0) | 2.4 (1.7-3.1) | 0.925 |  |  |
| >100 HU | 0 (0.0) | 4.9 (N/A) |  |  |  |
| **Portal vein tumor thrombus** |  |  |  |  |  |
| None | 1 (8.3) | 2.8 (0.0-5.6) | 0.056 |  |  |
| Small (<2cm) | 2 (66.7) | N/A |  |  |  |
| >2cm without main portal vein involvement | 2 (50.0) | 1.4 (N/A) |  |  |  |
| >2cm with main portal vein involvement | 0 (0.0) | 0.8 (0.0-2.1) |  |  |  |
| **Portal vein tumor thrombus, dichotomized** |  |  |  |  |  |
| None or <2cm | 3 (20.0) | 4.9 (0.4-9.4) | 0.169 |  |  |
| > 2cm with or without main portal vein involvement | 2 (25.0) | 1.4 (0.3-2.5) |  |  |  |
| **Portal vein bland thrombus** |  |  |  |  |  |
| None | 4 (19.0) | N/A | 0.637 |  |  |
| Small (<2cm) | 0 (0.0) | N/A |  |  |  |
| >2cm without main portal vein involvement | 1 (100.0) | N/A |  |  |  |
| >2cm with main portal vein involvement | - |  |  |  |  |
| **Hepatic vein tumor thrombus** |  |  |  |  |  |
| None | 5 (26.3) | 4.9 (0.4-9.4) | **0.004** |  |  |
| Small (<2cm) | 2 (0.0) | 0.3 (N/A) |  |  |  |
| >2cm without inferior vena cava involvement | 1 (0.0) | 1.6 (N/A) |  |  |  |
| >2cm with inferior vena cava involvement | 1 (0.0) | 0.7 (N/A) |  |  |  |
| **Hepatic vein tumor thrombus, dichotomized** |  |  |  |  |  |
| Absent | 5 (26.3) | 4.9 (0.4-9.4) | **0.001** | 8119.5 (0->1000) | 0.929 |
| Present | 0 (0.0) | 0.7 (0.0-1.7) |  |  |  |
| **Hepatic vein bland thrombus** |  |  |  |  |  |
| None |  |  | N/A |  |  |
| Small (<2cm) |  |  |  |  |  |
| >2cm without inferior vena cava involvement |  |  |  |  |  |
| >2cm with inferior vena cava involvement |  |  |  |  |  |
| **Cavernous transformation** |  |  |  |  |  |
| Absent | 5 (27.8) | 4.9 (0.0-12.9) | **0.002** | 0.38 (0.01-26.11) | 0.651 |
| Present | 0 (0.0) | 0.8 (0.6-1.0) |  |  |  |
| **Nodular liver contours** |  |  |  |  |  |
| Absent | 3 (27.3) | 2.3 (0.8-3.8) | 0.700 |  |  |
| Present | 2 (16.7) | 2.8 (0.0-6.2) |  |  |  |
| **Biliary dilatation or biliary stent** |  |  |  |  |  |
| Absent | 4 (26.7) | 7.3 (0.0-15.6) | 0.190 |  |  |
| Present | 1 (12.5) | 2.3 (0.5-4.1) |  |  |  |
| **Portal vein diameter** |  |  |  |  |  |
| <1.5 cm | 3 (21.4) | 2.8 (0.0-6.5) | 0.574 |  |  |
| >1.5 cm | 2 (25.0) | 2.4 (0.7-4.1) |  |  |  |
| **Spleen volume, cm3** |  |  |  |  |  |
| <450 cm3 | 4 (30.8) | 12.0 (0.0-25.9) | **0.042** | 1466.5 (0->1000) | 0.943 |
| >450 cm3 | 1 (10.0) | 2.3 (0.1-4.5) |  |  |  |
| **Recanalization of umbilical vein** |  |  |  |  |  |
| Absent | 3 (30.0) | 4.9 (0.0-15.6) | 0.104 |  |  |
| Present | 2 (15.4) | 2.3 (0.7-3.9) |  |  |  |
| **Periesophageal varices** |  |  |  |  |  |
| Absent | 3 (27.3) | 4.9 (0.0-13.4) | 0.182 |  |  |
| Present | 2 (16.7) | 2.3 (0.0-4.7) |  |  |  |
| **Splenorenal varices** |  |  |  |  |  |
| Absent | 5 (23.8) | 2.8 (2.2-3.4) | 0.917 |  |  |
| Present | 0 (0.0) | 0.8 (N/A) |  |  |  |
| **Short axis of largest locoregional lymph node** |  |  |  |  |  |
| <1.0 cm | 4 (30.8) | 7.3 (0.0-14.9) | **0.045** | 3.69 (0.14-99.1) | 0.437 |
| >1.0 cm | 1 (10.0) | 1.6 (0.1-3.2) |  |  |  |
| **Heterogeneous locoregional lymph node** |  |  |  |  |  |
| Absent | 5 (23.8) | 2.8 (0.0-6.4) | 0.445 |  |  |
| Present | 0 (0.0) | 1.6 (N/A) |  |  |  |
| **Heterogeneous retroperitoneal lymph node** |  |  |  |  |  |
| Absent | 5 (25.0) | 2.4 (1.5-3.3) | 0.943 |  |  |
| Present | 0 (0.0) | 2.8 (N/A) |  |  |  |
| **Heterogeneous extra-abdominal lymph node** |  |  |  |  |  |
| Absent | 5 (23.8) | 2.7 (0.0-6.4) | 0.726 |  |  |
| Present | 0 (0.0) | 2.8 (N/A) |  |  |  |
| **Non-nodal metastases** |  |  |  |  |  |
| Absent | 5 (26.3) | 4.9 (0.0-10.8) | 0.105 |  |  |
| Present | 0 (0.0) | 1.6 (0.0-3.3) |  |  |  |
| **Metastases (nodal and non-nodal)** |  |  |  |  |  |
| Absent | 5 (29.4) | 4.9 (0.0-10.8) | 0.252 |  |  |
| Present | 0 (0.0) | 2.4 (1.4-3.4) |  |  |  |
| **Parenchyma in phase/out of phase drop ratio** |  |  |  |  |  |
| <=10% |  |  | N/A |  |  |
| >10% |  |  |  |  |  |
| **Tumor in/out of phase drop ratio** |  |  |  |  |  |
| <=10% | 2 (40.0) | 18.1 (N/A) | 0.457 |  |  |
| >10% | 0 (0.0) | 0.8 (N/A) |  |  |  |
| **AFP** |  |  |  |  |  |
| <=400 ng/dL | 2 (28.6) | 17.0 (0.0-38.7) | 0.321 |  |  |
| >400 ng/dL | 3 (18.8) | 2.3 (0.1-4.5) |  |  |  |
| **INR** |  |  |  |  |  |
| <=1.5 | 5 (22.7) | 2.8 (0.0-5.6) | **0.049** |  |  |
| >1.5 | 0 (0.0) | 0.7 (N/A) |  |  |  |
| **Albumin** |  |  |  |  |  |
| <3.5 g/dL | 1 (9.1) | 1.6 (0.0-3.8) | **0.010** |  |  |
| >3.5 g/dL | 4 (33.3) | 12.0 (0.0-32.4) |  |  |  |
| **Total bilirubin** |  |  |  |  |  |
| <2.0 mg/dL |  |  | N/A |  |  |
| >2.0 mg/dL |  |  |  |  |  |
| **Direct bilirubin** |  |  |  |  |  |
| <0.8 mg/dL | 5 (23.8) | 2.8 (0.0-6.0) | **0.010** |  |  |
| >0.8 mg/dL | 0 (0.0) | 0.7 (N/A) |  |  |  |
| **Hemoglobin** |  |  |  |  |  |
| <12.0 g/dL | 2 (28.6) | 2.7 (0.0-5.5) | 0.630 |  |  |
| >12.0 g/dL | 3 (18.8) | 2.8 (2.0-3.6) |  |  |  |
| **Platelets - absolute count** |  |  |  |  |  |
| <150,000 | 2 (25.0) | 7.3 (1.4-13.2) | 0.612 |  |  |
| >150,000 | 3 (20.0) | 2.4 (1.0-3.8) |  |  |  |
| **Neutrophil to lymphocyte ratio** |  |  |  |  |  |
| ≤3 | 2 (15.4) | 4.9 (0.0-10.8) | 0.388 |  |  |
| >3 | 3 (30.0) | 2.4 (0.2-4.6) |  |  |  |
| **Platelet to lymphocyte ratio** |  |  |  |  |  |
| <230 | 4 (26.7) | 7.3 (0.0-15.1) | **0.050** | 0.00 (0->1000) | 0.942 |
| ≥230 | 1 (12.5) | 1.6 (0.1-3.1) |  |  |  |
| **MELD score** |  |  |  |  |  |
| ≤9 | 5 (29.4) | 7.3 (0.0-15.0) | **0.008** | 0.00 (0->1000) | 0.950 |
| >9 | 0 (0.0) | 0.7 (0.0-2.0) |  |  |  |
| **ALBI score** |  |  |  |  |  |
| ≤-2.6 (grade 1) | 3 (33.3) | 12.0 (0.0-27.6) | **0.010** |  |  |
| > -2.6 (grade 2 and 3) | 2 (14.3) | 1.6 (0.0-3.4) |  |  |  |

**Table S6:** Univariate and multivariate analyses of overall survival for treatment naïve patients (n=23). Statistically significant variables (p<0.05) were marked in bold. ALBI score: Albumin-Bilirubin score; AFP: alpha-fetoprotein; INR: international normalized ratio; IQR: interquartile range; MELD: model for end-stage liver disease; THID: transient hepatic intensity differences; THAD: transient hepatic attenuation differences.

|  | **Univariate analysis** | | | **Multivariate analysis** | |
| --- | --- | --- | --- | --- | --- |
| **Characteristics** | **Censored, n (%)** | **Median (95% CI), months** | **p-value** | **HR (95% CI)** | **p-value** |
| **Age - year** |  |  |  |  |  |
| ≤65 | 4 (33.3) | 8.2 (1.3-15.1) | 0.451 |  |  |
| >65 | 4 (36.4) | 18.7 (0.0-38.1) |  |  |  |
| **Gender** |  |  |  |  |  |
| Female | 4 (57.1) | 10.0 (7.3-12.7) | 0.221 |  |  |
| Male | 4 (25.0) | 7.7 (0.3-15.0) |  |  |  |
| **Locoregional therapy to extra-hepatic metastases while on atezolizumab-bevacizumab** |  |  |  |  |  |
| No | 7 (35.0) | 9.0 (1.7-16.3) | 0.846 |  |  |
| Yes | 1 (33.3) | 7.9 (N/A) |  |  |  |
| **Ascites** |  |  |  |  |  |
| None | 5 (35.7) | 10.0 (7.1-12.9) | **0.029** | 3.78 (0.2-69.69) | 0.372 |
| Mild | 3 (33.3) | 3.3 (0.0-7.9) |  |  |  |
| **Pleural effusion** |  |  |  |  |  |
| None | 8 (38.1) | 9.0 (7.1-10.9) | **0.021** | 206.34 (1.41-30167.58) | **0.036** |
| Mild | 0 (0.0) | 1.0 (N/A) |  |  |  |
| **Largest intrahepatic tumor diameter** |  |  |  |  |  |
| ≤7 cm |  |  |  |  |  |
| >7 cm | 4 (50.0) | 7.7 (0.0-22.5) | 0.463 |  |  |
| **Number of intra-hepatic disease foci** |  |  |  |  |  |
| 0-3 | 1 (100.0) | N/A | 0.163 |  |  |
| ≥4 | 7 (31.8) | N/A |  |  |  |
| **Tumor margin** |  |  |  |  |  |
| Well-demarcated | 5 (55.6) | 19.2 (18.2-20.2) | **0.005** | 9.18 (0.21-393.27) | 0.248 |
| Irregular/infiltrative | 3 (21.4) | 7.7 (0.0-19.0) |  |  |  |
| **Enhancing capsule** |  |  |  |  |  |
| Absent | 6 (35.3) | 7.9 (7.2-8.6) | 0.331 |  |  |
| Present | 2 (33.3) | 18.7 (0.0-48.9) |  |  |  |
| **THID/THAD** |  |  |  |  |  |
| Absent | 7 (35.0) | 9.0 (7.0-11.0) | 0.101 |  |  |
| Present | 1 (33.3) | 1.4 (1.1-1.7) |  |  |  |
| **Necrosis** |  |  |  |  |  |
| Absent | 2 (33.3) | 2.7 (0.0-10.6) | 0.612 |  |  |
| Present | 6 (35.3) | 8.2 (6.8-9.6) |  |  |  |
| **Extracapsular extension** |  |  |  |  |  |
| Absent | 5 (27.8) | 7.9 (2.8-13.0) | **0.017** | 0.43 (0.03-5.52) | 0.517 |
| Present | 3 (60.0) | N/A |  |  |  |
| **Liver parenchyma pre-contrast density** |  |  |  |  |  |
| ≤45 HU | 1 (20.0) | 10.0 (0.0-21.4) | 0.789 |  |  |
| >45 HU | 4 (50.0) | 7.7 (2.7-12.7) |  |  |  |
| **Tumor pre-contrast density** |  |  |  |  |  |
| <40 HU | 3 (60.0) | 7.7 (0.4-15.0) | 0.992 |  |  |
| ≥40 HU | 2 (25.0) | 9.0 (1.3-16.7) |  |  |  |
| **Tumor arterial phase density** |  |  |  |  |  |
| ≤100 HU | 2 (40.0) | 3.4 (1.9-4.9) | 0.154 |  |  |
| >100 HU | 3 (37.5) | 10.0 (7.5-12.5) |  |  |  |
| **Tumor portal phase** |  |  |  |  |  |
| ≤100 HU | 3 (42.9) | 7.7 (1.1-14.3) | 0.152 |  |  |
| >100 HU | 2 (33.3) | 10.0 (7.9-12.1) |  |  |  |
| **Tumor delayed phase** |  |  |  |  |  |
| ≤100 HU | 5 (41.7) | 9.0 (2.6-15.4) | 0.914 |  |  |
| >100 HU | 0 (0.0) | 10.0 (N/A) |  |  |  |
| **Portal vein tumor thrombus** |  |  |  |  |  |
| None | 3 (25.0) | 8.2 (7.5-8.9) | 0.247 |  |  |
| Small (<2cm) | 2 (66.7) | N/A |  |  |  |
| >2cm without main portal vein involvement | 2 (50.0) | 9.0 (N/A) |  |  |  |
| >2cm with main portal vein involvement | 1 (25.0) | 1.4 (0.0-3.1) |  |  |  |
| **Portal vein tumor thrombus, dichotomized** |  |  |  |  |  |
| None or <2cm | 5 (33.3) | 8.2 (4.7-11.7) | 0.159 |  |  |
| > 2cm with or without main portal vein involvement | 3 (37.5) | 2.7 (0.0-6.9) |  |  |  |
| **Portal vein bland thrombus** |  |  |  |  |  |
| None | 7 (33.3) | N/A | 0.681 |  |  |
| Small (<2cm) | 0 (0.0) | N/A |  |  |  |
| >2cm without main portal vein involvement | 1 (100.0) | N/A |  |  |  |
| >2cm with main portal vein involvement |  |  |  |  |  |
| **Hepatic vein tumor thrombus** |  |  |  |  |  |
| None | 7 (36.8) | N/A | **0.001** | 1.45 (0.06-34.61) | 0.819 |
| Small (<2cm) | 0 (0.0) | N/A |  |  |  |
| >2cm without inferior vena cava involvement | 1 (100.0) | N/A |  |  |  |
| >2cm with inferior vena cava involvement | 0 (0.0) | N/A |  |  |  |
| **Hepatic vein tumor thrombus, dichotomized** |  |  |  |  |  |
| Absent | 7 (36.8) | 9.0 (7.1-10.9) | 0.085 |  |  |
| Present | 1 (25.0) | 1.2 (0.0-3.5) |  |  |  |
| **Hepatic vein bland thrombus** |  |  |  |  |  |
| None | 8 (34.8) | 8.2 (6.6-9.8) | N/A |  |  |
| Small (<2cm) |  |  |  |  |  |
| >2cm without inferior vena cava involvement |  |  |  |  |  |
| >2cm with inferior vena cava involvement |  |  |  |  |  |
| **Cavernous transformation** |  |  |  |  |  |
| Absent | 7 (38.9) | 9.0 (6.6-11.4) | **0.013** | 8.62 (0.51-145.12) | 0.135 |
| Present | 1 (20.0) | 1.4 (1.0-1.8) |  |  |  |
| **Nodular liver contours** |  |  |  |  |  |
| Absent | 5 (45.5) | 9.0 (1.5-16.5) | 0.277 |  |  |
| Present | 3 (25.0) | 7.9 (1.5-14.3) |  |  |  |
| **Biliary dilatation or biliary stent** |  |  |  |  |  |
| Absent | 7 (46.7) | 18.7 (4.1-33.3) | 0.212 |  |  |
| Present | 1 (12.5) | 3.4 (0.0-10.2) |  |  |  |
| **Portal vein diameter** |  |  |  |  |  |
| <1.5 cm | 4 (28.6) | 9.0 (0.3-17.7) | 0.832 |  |  |
| >1.5 cm | 4 (50.0) | 7.9 (7.5-8.3) |  |  |  |
| **Spleen volume, cm3** |  |  |  |  |  |
| <450 cm3 | 7 (53.8) | 18.7 (7.1-30.3) | **0.001** | 0.15 (0.01-1.97) | 0.150 |
| >450 cm3 | 1 (10.0) | 3.3 (2.4-4.2) |  |  |  |
| **Recanalization of umbilical vein** |  |  |  |  |  |
| Absent | 5 (50.0) | 10.0 (7.5-12.5) | **0.028** | 0 (0->10000) | 0.913 |
| Present | 3 (23.1) | 3.4 (2.9-4.5) |  |  |  |
| **Periesophageal varices** |  |  |  |  |  |
| Absent | 6 (54.5) | 10.0 (0.0-22.2) | **0.008** | 202203.26 (0->10000) | 0.905 |
| Present | 2 (16.7) | 3.3 (2.3-4.3) |  |  |  |
| **Splenorenal varices** |  |  |  |  |  |
| Absent | 8 (38.1) | 8.2 (6.7-9.7) | 0.641 |  |  |
| Present | 0 (0.0) | 1.4 (N/A) |  |  |  |
| **Short axis of largest locoregional lymph node** |  |  |  |  |  |
| <1.0 cm | 6 (46.2) | 10.0 (7.0-13.0) | 0.124 |  |  |
| >1.0 cm | 2 (20.0) | 3.4 (0.0-9.5) |  |  |  |
| **Heterogeneous locoregional lymph node** |  |  |  |  |  |
| Absent | 7 (33.3) | 8.2 (1.8-14.6) | 0.818 |  |  |
| Present | 1 (50.0) | 7.7 (N/A) |  |  |  |
| **Heterogeneous retroperitoneal lymph node** |  |  |  |  |  |
| Absent | 8 (40.0) | 9.0 (0.3-18.0) | 0.926 |  |  |
| Present | 0 (0.0) | 8.2 (7.4-9.0) |  |  |  |
| **Heterogeneous extra-abdominal lymph node** |  |  |  |  |  |
| Absent | 8 (38.1) | 9.0 (1.9-16.1) | 0.468 |  |  |
| Present | 0 (0.0) | 7.7 (N/A) |  |  |  |
| **Non-nodal metastases** |  |  |  |  |  |
| Absent | 6 (31.6) | 7.9 (5.6-10.2) | 0.978 |  |  |
| Present | 2 (50.0) | 8.2 (0.0-18.7) |  |  |  |
| **Metastases (nodal and non-nodal)** |  |  |  |  |  |
| Absent | 6 (35.3) | 7.9 (0.0-16.5) | 0.954 |  |  |
| Present | 2 (33.3) | 8.2 (7.2-9.2) |  |  |  |
| **Parenchyma in phase/out of phase drop ratio** |  |  |  |  |  |
| <=10% |  |  | N/A |  |  |
| >10% |  |  |  |  |  |
| **Tumor in/out of phase drop ratio** |  |  |  |  |  |
| <=10% | 3 (60.0) | N/A | 0.497 |  |  |
| >10% | 0 (0.0) | 1.4 (N/A) |  |  |  |
| **AFP** |  |  |  |  |  |
| <=400 ng/dL | 4 (57.1) | 18.7 (1.6-35.8) | 0.302 |  |  |
| >400 ng/dL | 4 (25.0) | 7.7 (0.0-15.7) |  |  |  |
| **INR** |  |  |  |  |  |
| <=1.5 | 8 (36.4) | 8.2 (6.3-10.1) | **0.002** | 15.74 (0.04-6864.24) | 0.374 |
| >1.5 | 0 (0.0) | 1.2 (N/A) |  |  |  |
| **Albumin** |  |  |  |  |  |
| <3.5 g/dL | 2 (18.2) | 2.7 (0.0-9.0) | **0.003** |  |  |
| >3.5 g/dL | 6 (50.0) | 18.7 (0.0-41.3) |  |  |  |
| **Total bilirubin** |  |  |  |  |  |
| <2.0 mg/dL |  |  | N/A |  |  |
| >2.0 mg/dL |  |  |  |  |  |
| **Direct bilirubin** |  |  |  |  |  |
| <0.8 mg/dL | 8 (38.1) | 9.0 (7.0-10.9) | **0.001** |  |  |
| >0.8 mg/dL | 0 (0.0) | 1.2 (N/A) |  |  |  |
| **Hemoglobin** |  |  |  |  |  |
| <12.0 g/dL | 3 (42.9) | 7.9 (3.0-12.8) | 0.381 |  |  |
| >12.0 g/dL | 5 (31.3) | 9.0 (6.4-11.6) |  |  |  |
| **Platelets - absolute count** |  |  |  |  |  |
| <150,000 | 2 (25.0) | 10.0 (5.6-14.4) | 0.787 |  |  |
| >150,000 | 6 (40.0) | 8.2 (0.7-15.7) |  |  |  |
| **Neutrophil to lymphocyte ratio** |  |  |  |  |  |
| ≤3 | 4 (30.8) | 10.0 (7.1-12.9) | **0.038** | 7.21 (0.3-172.93) | 0.223 |
| >3 | 4 (40.0) | 3.3 (0.6-6.0) |  |  |  |
| **Platelet to lymphocyte ratio** |  |  |  |  |  |
| <230 | 5 (33.3) | 9.0 (6.0-12.0) | 0.172 |  |  |
| ≥230 | 3 (37.5) | 3.3 (0.0-7.9) |  |  |  |
| **MELD score** |  |  |  |  |  |
| ≤9 | 7 (41.2) | 9.0 (7.2-10.8) | 0.080 |  |  |
| >9 | 1 (16.7) | 1.8 (0.1-3.5) |  |  |  |
| **ALBI score** |  |  |  |  |  |
| ≤-2.6 (grade 1) | 5 (55.6) | 19.2 (8.1-30.3) | **0.001** | 8.79 (0.36-213.3) | 0.182 |
| > -2.6 (grade 2 and 3) | 3 (21.4) | 3.3 (2.2-4.4) |  |  |  |

**Table S7:** Univariate and multivariate analyses of progression free survival for patients who received prior therapy (n=32). Statistically significant variables (p<0.05) were marked in bold. ALBI score: Albumin-Bilirubin score; AFP: alpha-fetoprotein; INR: international normalized ratio; IQR: interquartile range; MELD: model for end-stage liver disease; THID: transient hepatic intensity differences; THAD: transient hepatic attenuation differences.

|  | **Univariate analysis** | | | **Multivariate analysis** | |
| --- | --- | --- | --- | --- | --- |
| **Characteristics** | **Censored, n (%)** | **Median (95% CI), months** | **p-value** | **HR (95% CI)** | **p-value** |
| **Age - year** |  |  |  |  |  |
| ≤65 | 3 (25.0) | 2.8 (2.6-3.0) | 0.784 |  |  |
| >65 | 2 (10.0) | 4.5 (0.0-10.6) |  |  |  |
| **Gender** |  |  |  |  |  |
| Female | 1 (33.3) | 1.5 (0.3-6.1) |  |  |  |
| Male | 4 (14.8) | 4.5 (0.0-9.5) |  |  |  |
| **Locoregional therapy to extra-hepatic metastases while on atezolizumab-bevacizumab** |  |  |  |  |  |
| No | 4 (14.3) | 3.1 (0.0-7.1) | 0.761 |  |  |
| Yes | 1 (25.0) | 3.2 (0.0-10.7) |  |  |  |
| **Ascites** |  |  |  |  |  |
| None | 4 (17.4) | 6.5 (0.7-12.4) | **0.035** | 2.84 (0.67-11.99) | 0.156 |
| Mild | 1 (11.1) | 3.0 (1.2-4.8) |  |  |  |
| **Pleural effusion** |  |  |  |  |  |
| None | 5 (17.2) | 4.5 (0.0-9.3) | 0.228 |  |  |
| Mild | 0 (0.0) | 0.9 (0.4-1.4) |  |  |  |
| **Largest intrahepatic tumor diameter** |  |  |  |  |  |
| ≤7 cm | 4 (20.0) | 3.2 (0.0-6.9) | 0.903 |  |  |
| >7 cm | 1 (10.0) | 3.1 (0.0-9.6) |  |  |  |
| **Number of intra-hepatic disease foci** |  |  |  |  |  |
| 0-3 | 2 (25.0) | 3.2 (0.0-7.9) | 0.537 |  |  |
| ≥4 | 3 (12.5) | 3.1 (0.0-6.9) |  |  |  |
| **Tumor margin** |  |  |  |  |  |
| Well-demarcated | 3 (23.1) | 6.0 (0.9-11.1) | 0.485 |  |  |
| Irregular/infiltrative | 2 (11.8) | 3.1 (2.6-3.6) |  |  |  |
| **Enhancing capsule** |  |  |  |  |  |
| Absent | 3 (14.3) | 3.1 (0.6-5.6) | 0.278 |  |  |
| Present | 2 (22.2) | 8.9 (0.0-22.8) |  |  |  |
| **THID/THAD** |  |  |  |  |  |
| Absent | 3 (11.5) | 3.1 (0.0-7.0) | 0.434 |  |  |
| Present | 2 (50.0) | 3.2 (N/A) |  |  |  |
| **Necrosis** |  |  |  |  |  |
| Absent | 3 (33.3) | 3.0 (2.1-3.9) | 0.249 |  |  |
| Present | 2 (9.5) | 4.5 (0.3-8.7) |  |  |  |
| **Extracapsular extension** |  |  |  |  |  |
| Absent | 5 (23.8) | 6.0 (1.3-10.7) | 0.204 |  |  |
| Present | 0 (0.0) | 3.1 (2.8-3.4) |  |  |  |
| **Liver parenchyma pre-contrast density** |  |  |  |  |  |
| ≤45 HU | 0 (0.0) | 6.3 (0.0-17.5) | 0.358 |  |  |
| >45 HU | 3 (17.6) | 3.1 (0.8-5.4) |  |  |  |
| **Tumor pre-contrast density** |  |  |  |  |  |
| <40 HU | 0 (0.0) | 2.8 (1.4-4.2) | **0.026** | 0.22 (0.06-0.84) | **0.027** |
| ≥40 HU | 3 (33.3) | 11.3 (0.0-27.7) |  |  |  |
| **Tumor arterial phase density** |  |  |  |  |  |
| ≤100 HU | 1 (7.1) | 2.8 (2.1-3.5) | 0.087 |  |  |
| >100 HU | 2 (28.6) | 7.2 (0.0-18.0) |  |  |  |
| **Tumor portal phase** |  |  |  |  |  |
| ≤100 HU | 0 (0.0) | 2.8 (0.0-8.7) | 0.578 |  |  |
| >100 HU | 3 (27.3) | 3.1 (0.0-6.7) |  |  |  |
| **Tumor delayed phase** |  |  |  |  |  |
| ≤100 HU | 3 (16.7) | 3.1 (0.0-9.6) | 0.515 |  |  |
| >100 HU | 0 (0.0) | 2.7 (0.9-4.5) |  |  |  |
| **Portal vein tumor thrombus** |  |  |  |  |  |
| None | 2 (9.1) | 4.5 (0.1-8.9) | 0.388 |  |  |
| Small (<2cm) | 2 (66.7) | N/A |  |  |  |
| >2cm without main portal vein involvement | 1 (16.7) | 1.4 (0.0-3.0) |  |  |  |
| >2cm with main portal vein involvement | 0 (0.0) | 3.1 (N/A) |  |  |  |
| **Portal vein tumor thrombus, dichotomized** |  |  |  |  |  |
| None or <2cm | 4 (16.0) | 6.0 (1.4-10.6) | 0.316 |  |  |
| > 2cm with or without main portal vein involvement | 1 (14.3) | 2.4 (0.0-5.0) |  |  |  |
| **Portal vein bland thrombus** |  |  |  |  |  |
| None | 5 (16.7) | 3.1 (0.8-5.4) | 0.709 |  |  |
| Small (<2cm) | 0 (0.0) | 6.3 (N/A) |  |  |  |
| >2cm without main portal vein involvement | - |  |  |  |  |
| >2cm with main portal vein involvement | - |  |  |  |  |
| **Hepatic vein tumor thrombus** |  |  |  |  |  |
| None | 5 (16.7) | 4.5 (0.5-8.5) | **<0.001** |  |  |
| Small (<2cm) | 0 (0.0) | 0.6 (N/A) |  |  |  |
| >2cm without inferior vena cava involvement | - |  |  |  |  |
| >2cm with inferior vena cava involvement | - |  |  |  |  |
| **Hepatic vein tumor thrombus, dichotomized** |  |  |  |  |  |
| Absent | 5 (16.7) | 4.5 (0.5-8.5) | **<0.001** | 24.87 (1.44-430.07) | **0.027** |
| Present | 0 (0.0) | 0.6 (N/A) |  |  |  |
| **Hepatic vein bland thrombus** |  |  |  |  |  |
| None | 4 (13.3) | 3.2 (0.0-7.1) | 0.605 |  |  |
| Small (<2cm) | 1 (50.0) | 1.4 (N/A) |  |  |  |
| >2cm without inferior vena cava involvement | - |  |  |  |  |
| >2cm with inferior vena cava involvement | - |  |  |  |  |
| **Cavernous transformation** |  |  |  |  |  |
| Absent | 5 (16.1) | 4.5 (0.3-8.7) | 0.611 |  |  |
| Present | 0 (0.0) | 3.1 (N/A) |  |  |  |
| **Nodular liver contours** |  |  |  |  |  |
| Absent | 1 (10.0) | 3.1 (0.0-9.3) | 0.836 |  |  |
| Present | 4 (18.2) | 3.2 (0.0-6.8) |  |  |  |
| **Biliary dilatation or biliary stent** |  |  |  |  |  |
| Absent | 2 (8.0) | 3.2 (0.4-6.0) | 0.431 |  |  |
| Present | 3 (42.9) | 6.3 (1.4-11.2) |  |  |  |
| **Portal vein diameter** |  |  |  |  |  |
| <1.5 cm | 3 (15.0) | 4.5 (0.0-10.3) | 0.394 |  |  |
| >1.5 cm | 2 (16.7) | 3.0 (2.5-3.5) |  |  |  |
| **Spleen volume, cm3** |  |  |  |  |  |
| <450 cm3 | 3 (25.0) | 7.2 (0.5-13.9) | 0.229 |  |  |
| >450 cm3 | 2 (10.0) | 3.0 (2.3-3.7) |  |  |  |
| **Recanalization of umbilical vein** |  |  |  |  |  |
| Absent | 3 (17.6) | 6.0 (1.6-10.4) | 0.584 |  |  |
| Present | 2 (13.3) | 3.1 (1.0-5.2) |  |  |  |
| **Periesophageal varices** |  |  |  |  |  |
| Absent | 2 (16.7) | 6.5 (5.1-7.9) | 0.412 |  |  |
| Present | 3 (15.0) | 2.8 (2.2-3.4) |  |  |  |
| **Splenorenal varices** |  |  |  |  |  |
| Absent | 4 (14.8) | 1.3 (0.7-5.7) | 0.246 |  |  |
| Present | 1 (20.0) | 11.3 (0.0-29.8) |  |  |  |
| **Short axis of largest locoregional lymph node** |  |  |  |  |  |
| <1.0 cm | 2 (10.0) | 3.0 (2.3-3.7) | 0.943 |  |  |
| >1.0 cm | 3 (25.0) | 6.3 (2.0-10.6) |  |  |  |
| **Heterogeneous locoregional lymph node** |  |  |  |  |  |
| Absent | 4 (15.4) | 3.1 (0.0-7.0) | 0.482 |  |  |
| Present | 1 (16.7) | 3.2 (0.0-7.3) |  |  |  |
| **Heterogeneous retroperitoneal lymph node** |  |  |  |  |  |
| Absent | 4 (14.3) | 4.5 (0.4-8.6) | 0.279 |  |  |
| Present | 1 (25.0) | 2.0 (0.0-4.5) |  |  |  |
| **Heterogeneous extra-abdominal lymph node** |  |  |  |  |  |
| Absent | 5 (17.2) | 6.0 (1.0-11.0) | **<0.001** | 12.26 (0.89-169.46) | 0.061 |
| Present | 3 (0.0) | 1.4 (0.1-2.7) |  |  |  |
| **Non-nodal metastases** |  |  |  |  |  |
| Absent | 4 (20.0) | 4.5 (0.0-11.1) | 0.324 |  |  |
| Present | 1 (8.3) | 3.0 (1.5-4.5) |  |  |  |
| **Metastases (nodal and non-nodal)** |  |  |  |  |  |
| Absent | 4 (20.0) | 4.5 (0.0-11.1) | 0.324 |  |  |
| Present | 1 (8.3) | 3.0 (1.5-4.5) |  |  |  |
| **Parenchyma in phase/out of phase drop ratio** |  |  |  |  |  |
| <=10% | 0 (0.0) | 2.4 (0.8-4.0) | 0.063 |  |  |
| >10% | 1 (50.0) | 15.4 (N/A) |  |  |  |
| **Tumor in/out of phase drop ratio** |  |  |  |  |  |
| <=10% | 1 (33.3) | 15.4 (N/A) | **0.039** |  |  |
| >10% | 0 (0.0) | 1.4 (N/A) |  |  |  |
| **AFP** |  |  |  |  |  |
| <=400 ng/dL | 3 (14.3) | 6.0 (1.1-11.0) | 0.347 |  |  |
| >400 ng/dL | 2 (18.2) | 3.1 (1.6-4.6) |  |  |  |
| **INR** |  |  |  |  |  |
| <=1.5 | 5 (16.1) | 3.2 (0.0-6.6) | 0.932 |  |  |
| >1.5 | 0 (0.0) | 7.2 (N/A) |  |  |  |
| **Albumin** |  |  |  |  |  |
| <3.5 g/dL | 2 (12.5) | 3.0 (2.4-3.6) | 0.097 |  |  |
| >3.5 g/dL | 3 (18.8) | 4.5 (0.0-11.0) |  |  |  |
| **Total bilirubin** |  |  |  |  |  |
| <2.0 mg/dL | 3 (10.7) | 3.1 (0.9-5.3) | 0.573 |  |  |
| >2.0 mg/dL | 2 (50.0) | 6.3 (N/A) |  |  |  |
| **Direct bilirubin** |  |  |  |  |  |
| <0.8 mg/dL | 4 (14.3) | 3.2 (0.0-7.0) | 0.641 |  |  |
| >0.8 mg/dL | 1 (25.0) | 2.8 (0.0-5.9) |  |  |  |
| **Hemoglobin** |  |  |  |  |  |
| <12.0 g/dL | 1 (7.7) | 3.0 (2.8-3.8) | 0.090 |  |  |
| >12.0 g/dL | 4 (21.1) | 6.3 (3.7-8.9) |  |  |  |
| **Platelets - absolute count** |  |  |  |  |  |
| <150,000 | 1 (6.7) | 3.1 (1.4-4.8) | 0.332 |  |  |
| >150,000 | 4 (23.5) | 7.2 (1.7-12.7) |  |  |  |
| **Neutrophil to lymphocyte ratio** |  |  |  |  |  |
| ≤3 | 2 (25.0) | 8.6 (2.8-14.4) | 0.108 |  |  |
| >3 | 3 (12.5) | 2.8 (2.3-3.3) |  |  |  |
| **Platelet to lymphocyte ratio** |  |  |  |  |  |
| <230 | 3 (14.3) | 6.3 (3.7-8.9) | 0.395 |  |  |
| ≥230 | 2 (18.2) | 2.7 (1.9-3.5) |  |  |  |
| **MELD score** |  |  |  |  |  |
| ≤9 | 2 (10.5) | 3.0 (2.4-3.6) | 0.660 |  |  |
| >9 | 3 (23.1) | 6.3 (5.6-7.0) |  |  |  |
| **ALBI score** |  |  |  |  |  |
| ≤-2.6 (grade 1) | 2 (25.0) | 2.7 (1.8-3.5) | 0.487 |  |  |
| > -2.6 (grade 2 and 3) | 3 (12.5) | 4.5 (0.0-9.0) |  |  |  |

**Table S8:** Univariate and multivariate analyses of overall survival for patients who received prior therapy (n=32). Statistically significant variables (p<0.05) were marked in bold. ALBI score: Albumin-Bilirubin score; AFP: alpha-fetoprotein; INR: international normalized ratio; IQR: interquartile range; MELD: model for end-stage liver disease; THID: transient hepatic intensity differences; THAD: transient hepatic attenuation differences.

|  | **Univariate analysis** | | | **Multivariate analysis** | |
| --- | --- | --- | --- | --- | --- |
| **Characteristics** | **Censored, n (%)** | **Median (95% CI), months** | **p-value** | **HR (95% CI)** | **p-value** |
| **Age - year** |  |  |  |  |  |
| ≤65 | 6 (50.0) | 12.8 (8.4-17.2) | 0.767 |  |  |
| >65 | 8 (40.0) | 12.3 (5.6-19.0) |  |  |  |
| **Gender** |  |  |  |  |  |
| Female | 2 (66.7) | 15.5 (N/A) | 0.408 |  |  |
| Male | 12 (41.4) | 11.3 (7.2-15.4) |  |  |  |
| **Locoregional therapy to extra-hepatic metastases while on atezolizumab-bevacizumab** |  |  |  |  |  |
| No | 12 (42.9) | 12.3 (9.2-15.4) | 0.553 |  |  |
| Yes | 2 (50.0) | 15.5 (3.8-27.2) |  |  |  |
| **Ascites** |  |  |  |  |  |
| None | 12 (52.2) | 12.8 (7.0-18.6) | **0.014** | 58.83 (2.98-1163.13) | **0.007** |
| Mild | 2 (22.2) | 7.3 (5.4-9.2) |  |  |  |
| **Pleural effusion** |  |  |  |  |  |
| None | 13 (44.8) | 12.8 (8.0-17.6) | 0.137 |  |  |
| Mild | 1 (33.3) | 7.7 (N/A) |  |  |  |
| **Largest intrahepatic tumor diameter** |  |  |  |  |  |
| ≤7 cm | 11 (55.0) | 15.5 (13.0-18.0) | **0.028** | 3.82 (0.47-31.06) | 0.210 |
| >7 cm | 1 (10.0) | 8.9 (4.4-13.4) |  |  |  |
| **Number of intra-hepatic disease foci** |  |  |  |  |  |
| 0-3 | 7 (87.5) | 15.5 (N/A) | 0.185 |  |  |
| ≥4 | 7 (29.2) | 11.3 (7.1-15.5) |  |  |  |
| **Tumor margin** |  |  |  |  |  |
| Well-demarcated | 7 (53.8) | 16.5 (5.2-27.8) | **0.006** | 0.60 (0.07-5.25) | 0.646 |
| Irregular/infiltrative | 5 (29.4) | 9.4 (5.7-12.9) |  |  |  |
| **Enhancing capsule** |  |  |  |  |  |
| Absent | 8 (38.1) | 10.6 (6.7-14.4) | 0.077 |  |  |
| Present | 4 (44.4) | 15.5 (2.2-28.8) |  |  |  |
| **THID/THAD** |  |  |  |  |  |
| Absent | 10 (38.5) | 11.3 (6.4-16.2) | 0.887 |  |  |
| Present | 2 (50.0) | 15.5 (N/A) |  |  |  |
| **Necrosis** |  |  |  |  |  |
| Absent | 6 (66.7) | N/A | 0.147 |  |  |
| Present | 6 (28.6) | 11.3 (7.8-15.0) |  |  |  |
| **Extracapsular extension** |  |  |  |  |  |
| Absent | 11 (52.4) | 14.8 (6.4-23.2) | **0.046** | 0.11 (0.00-3.82) | 0.221 |
| Present | 1 (11.1) | 11.3 (6.5-16.1) |  |  |  |
| **Liver parenchyma pre-contrast density** |  |  |  |  |  |
| ≤45 HU | 1 (20.0) | 10.6 (4.1-17.1) | 0.161 |  |  |
| >45 HU | 6 (35.3) | 11.3 (6.8-15.8) |  |  |  |
| **Tumor pre-contrast density** |  |  |  |  |  |
| <40 HU | 2 (16.7) | 8.9 (5.2-12.6) | **0.012** | 0.09 (0.01-0.80) | **0.030** |
| ≥40 HU | 5 (55.6) | 27.0 (N/A) |  |  |  |
| **Tumor arterial phase density** |  |  |  |  |  |
| ≤100 HU | 4 (28.6) | 8.9 (6.3-11.5) | 0.108 |  |  |
| >100 HU | 3 (42.9) | 27.0 (N/A) |  |  |  |
| **Tumor portal phase** |  |  |  |  |  |
| ≤100 HU | 3 (30.0) | 11.3 (8.8-13.8) | 0.682 |  |  |
| >100 HU | 4 (36.4) | 8.9 (5.0-12.8) |  |  |  |
| **Tumor delayed phase** |  |  |  |  |  |
| ≤100 HU | 6 (33.3) | 10.6 (7.5-13.7) | 0.895 |  |  |
| >100 HU | 1 (33.3) | 8.9 (0.0-20.6) |  |  |  |
| **Portal vein tumor thrombus** |  |  |  |  |  |
| None | 9 (40.9) | 14.8 (9.9-19.7) | **0.015** |  |  |
| Small (<2cm) | 2 (66.7) | 9.4 (N/A) |  |  |  |
| >2cm without main portal vein involvement | 3 (50.0) | 8.9 (7.4-10.4) |  |  |  |
| >2cm with main portal vein involvement | 0 (0.0) | 3.1 (N/A) |  |  |  |
| **Portal vein tumor thrombus, dichotomized** |  |  |  |  |  |
| None or <2cm | 11 (44.0) | 14.8 (10.5-19.1) | **0.060** | 1.29 (0.08-21.70) | 0.860 |
| > 2cm with or without main portal vein involvement | 3 (42.9) | 8.9 (3.4-14.4) |  |  |  |
| **Portal vein bland thrombus** |  |  |  |  |  |
| None | 14 (46.7) | 12.8 (7.1-18.5) | 0.151 |  |  |
| Small (<2cm) | 0 (0.0) | 6.3 (N/A) |  |  |  |
| >2cm without main portal vein involvement |  |  |  |  |  |
| >2cm with main portal vein involvement |  |  |  |  |  |
| **Hepatic vein tumor thrombus** |  |  |  |  |  |
| None | 13 (43.3) | 12.8 (7.8-17.8) | **0.031** |  |  |
| Small (<2cm) | 1 (50.0) | 2.8 (N/A) |  |  |  |
| >2cm without inferior vena cava involvement |  |  |  |  |  |
| >2cm with inferior vena cava involvement |  |  |  |  |  |
| **Hepatic vein tumor thrombus, dichotomized** |  |  |  |  |  |
| Absent | 13 (43.3) | 12.8 (7.8-17.8) | **0.031** | 2.5 (0.02-281.26) | 0.703 |
| Present | 1 (50.0) | 2.8 (N/A) |  |  |  |
| **Hepatic vein bland thrombus** |  |  |  |  |  |
| None | 12 (40.0) | N/A | 0.444 |  |  |
| Small (<2cm) |  |  |  |  |  |
| >2cm without inferior vena cava involvement | 2 (100.0) | N/A |  |  |  |
| >2cm with inferior vena cava involvement |  |  |  |  |  |
| **Cavernous transformation** |  |  |  |  |  |
| Absent | 14 (45.2) | 12.8 (7.9-17.7) | **0.003** | 0.73 (0.01-65.58) | 0.890 |
| Present | 0 (0.0) | 3.1 (N/A) |  |  |  |
| **Nodular liver contours** |  |  |  |  |  |
| Absent | 6 (60.0) | 12.3 (9.8-14.8) | 0.315 |  |  |
| Present | 8 (36.4) | 12.8 (6.6-19.0) |  |  |  |
| **Biliary dilatation or biliary stent** |  |  |  |  |  |
| Absent | 10 (40.0) | 12.8 (8.1-17.5) | 0.239 |  |  |
| Present | 4 (57.1) | 6.3 (1.6-11.0) |  |  |  |
| **Portal vein diameter** |  |  |  |  |  |
| <1.5 cm | 8 (40.0) | 14.8 (10.2-19.4) | 0.321 |  |  |
| >1.5 cm | 6 (50.0) | 10.6 (3.9-17.3) |  |  |  |
| **Spleen volume, cm3** |  |  |  |  |  |
| <450 cm3 | 7 (58.3) | 15.5 (N/A) | 0.054 |  |  |
| >450 cm3 | 7 (35.0) | 9.4 (5.5-13.3) |  |  |  |
| **Recanalization of umbilical vein** |  |  |  |  |  |
| Absent | 9 (52.9) | 14.8 (9.6-20.0) | 0.690 |  |  |
| Present | 5 (33.3) | 11.3 (6.0-16.6) |  |  |  |
| **Periesophageal varices** |  |  |  |  |  |
| Absent | 6 (50.0) | 11.3 (8.9-13.7) | 0.824 |  |  |
| Present | 8 (40.0) | 14.8 (5.7-23.9) |  |  |  |
| **Splenorenal varices** |  |  |  |  |  |
| Absent | 11 (40.7) | 12.3 (6.6-18.0) | 0.155 |  |  |
| Present | 3 (60.0) | 27.0 (N/A) |  |  |  |
| **Short axis of largest locoregional lymph node** |  |  |  |  |  |
| <1.0 cm | 9 (45.0) | 12.8 (8.4-17.2) | 0.193 |  |  |
| >1.0 cm | 5 (41.7) | 10.6 (4.0-17.2) |  |  |  |
| **Heterogeneous locoregional lymph node** |  |  |  |  |  |
| Absent | 12 (46.2) | 12.8 (8.3-17.3) | 0.166 |  |  |
| Present | 2 (33.3) | 7.3 (3.1-11.5) |  |  |  |
| **Heterogeneous retroperitoneal lymph node** |  |  |  |  |  |
| Absent | 12 (42.9) | 12.3 (9.2-15.4) | 0.616 |  |  |
| Present | 2 (50.0) | 7.3 (N/A) |  |  |  |
| **Heterogeneous extra-abdominal lymph node** |  |  |  |  |  |
| Absent | 12 (41.4) | 12.8 (7.9-17.7) | 0.351 |  |  |
| Present | 2 (66.7) | 7.3 (N/A) |  |  |  |
| **Non-nodal metastases** |  |  |  |  |  |
| Absent | 10 (50.0) | 16.5 (8.6-24.4) | 0.376 |  |  |
| Present | 4 (33.3) | 10.6 (5.6-15.6) |  |  |  |
| **Metastases (nodal and non-nodal)** |  |  |  |  |  |
| Absent | 10 (50.0) | 16.5 (8.6-24.4) | 0.376 |  |  |
| Present | 4 (33.3) | 10.6 (5.6-15.6) |  |  |  |
| **Parenchyma in phase/out of phase drop ratio** |  |  |  |  |  |
| <=10% | 1 (33.3) | N/A | 0.157 |  |  |
| >10% | 2 (100.0) | N/A |  |  |  |
| **Tumor in/out of phase drop ratio** |  |  |  |  |  |
| <=10% | 2 (66.7) | 14.8 (N/A) | 0.083 |  |  |
| >10% | 1 (50.0) | 7.9 (N/A) |  |  |  |
| **AFP** |  |  |  |  |  |
| <=400 ng/dL | 8 (38.1) | 12.8 (8.1-17.5) | 0.325 |  |  |
| >400 ng/dL | 6 (54.5) | 10.6 (8.7-12.5) |  |  |  |
| **INR** |  |  |  |  |  |
| <=1.5 | 14 (45.2) | 12.8 (7.0-18.6) | 0.692 |  |  |
| >1.5 | 0 (0.0) | 12.3 (N/A) |  |  |  |
| **Albumin** |  |  |  |  |  |
| <3.5 g/dL | 4 (25.0) | 7.7 (6.0-9.4) | **<0.001** |  |  |
| >3.5 g/dL | 10 (62.5) | 27.0 (11.4-42.6) |  |  |  |
| **Total bilirubin** |  |  |  |  |  |
| <2.0 mg/dL | 11 (39.3) | 12.8 (7.8-17.8) | 0.411 |  |  |
| >2.0 mg/dL | 3 (75.0) | 6.3 (N/A) |  |  |  |
| **Direct bilirubin** |  |  |  |  |  |
| <0.8 mg/dL | 12 (42.9) | 12.8 (7.9-17.7) | **0.008** |  |  |
| >0.8 mg/dL | 2 (50.0) | 12.3 (9.0-15.5) |  |  |  |
| **Hemoglobin** |  |  |  |  |  |
| <12.0 g/dL | 4 (30.8) | 8.9 (7.3-10.5) | **0.005** | 0.32 (0.01-8.83) | 0.498 |
| >12.0 g/dL | 10 (52.6) | 16.5 (6.9-26.1) |  |  |  |
| **Platelets - absolute count** |  |  |  |  |  |
| <150,000 | 6 (40.0) | 11.3 (6.3-16.3) | 0.526 |  |  |
| >150,000 | 8 (47.1) | 12.8 (7.4-18.2) |  |  |  |
| **Neutrophil to lymphocyte ratio** |  |  |  |  |  |
| ≤3 | 4 (50.0) | 27.0 (N/A) | 0.195 |  |  |
| >3 | 10 (41.7) | 11.3 (7.9-14.7) |  |  |  |
| **Platelet to lymphocyte ratio** |  |  |  |  |  |
| <230 | 9 (42.9) | 14.8 (8.6-21.0) | 0.636 |  |  |
| ≥230 | 5 (45.5) | 12.3 (6.8-17.8) |  |  |  |
| **MELD score** |  |  |  |  |  |
| ≤9 | 8 (42.1) | 15.5 (8.7-22.3) | 0.114 |  |  |
| >9 | 6 (46.2) | 11.3 (7.2-15.4) |  |  |  |
| **ALBI score** |  |  |  |  |  |
| ≤-2.6 (grade 1) | 6 (75.0) | N/A | **0.008** | 6.00 (0.3-118.48) | 0.239 |
| > -2.6 (grade 2 and 3) | 8 (33.3) | 9.4 (6.1-12.7) |  |  |  |
